# Supplementary material for: Patterns of primates crop foraging and the impacts on incomes of smallholders across the mosaic agricultural landscape of Wolaita zone, southern Ethiopia
Source: PubMed Central journal article supplement (PMC11573158; doi:10.1371/journal.pone.0313831), 2024-11-18
Supplement: pone.0313831.s015.pdf [file pone.0313831.s015.pdf]

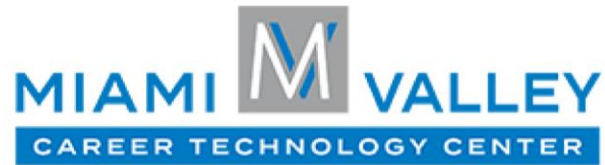

THIS CERTIFICATE IS AWARDED TO

**ABEBAYEHU DESALEGN  
HAILEMARIAM**

in recognition of superior participation, outstanding  
achievements, and excellent progress in Aspire  
English for Speakers of Other Languages (ESOL) classes

AUGUST 2023 – MAY 2024

May 23, 2024

Date Issued

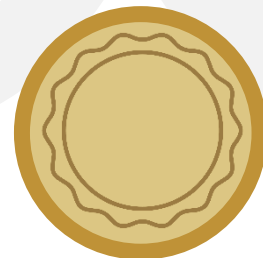

*May Beth Johnson*

Adult ESOL Instructor
