# Supplementary material for: Patterns of primates crop foraging and the impacts on incomes of smallholders across the mosaic agricultural landscape of Wolaita zone, southern Ethiopia
Source: PubMed Central journal article supplement (PMC11573158; doi:10.1371/journal.pone.0313831), 2024-11-18
Supplement: pone.0313831.s016.pdf [file pone.0313831.s016.pdf]

Haramaya University  
Registrar Office

☎ : 138; 📠 : +251255530313

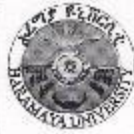

ሐረግዎ የገበርሱት  
ሬጅስትራር ቢሮ

☎ : +251255530331/25

Ref: ዩ/ወ/ገ/ገጽ/1/3

Date: 10/06/2013

ቀን: \_\_\_\_\_

**TO WHOM IT MAY CONCERN**

Mr/Mrs. SiSay Belay Bedeke has requested us to write him/her a letter verifying the language of instruction at higher learning institutions in Ethiopia. This is, therefore, to kindly inform you that the language of instruction in Ethiopian High School and higher Learning Institutions in general and at Haramaya University in particular, where Mr/Mrs. SiSay Belay Bedeke earned his/her BS.c&M.c Degree is English.

Sincerely,

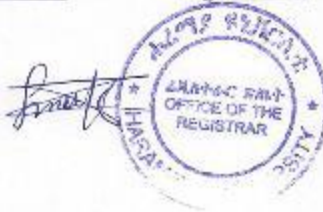

In reply, please cite our reference number
