# Supplementary material for: Patterns of primates crop foraging and the impacts on incomes of smallholders across the mosaic agricultural landscape of Wolaita zone, southern Ethiopia
Source: PubMed Central journal article supplement (PMC11573158; doi:10.1371/journal.pone.0313831), 2024-11-18
Supplement: pone.0313831.s025.pdf [file pone.0313831.s025.pdf]

# PLOS ONE

## Crop Damage by Nonhuman Primates: Quantifying the Keys Parameters of Crop-Raiding events on the Livelihoods of Smallholders in an Agriculture- Forest Mosaic Landscape, Wolaita Zone, Southern Ethiopia

--Manuscript Draft--

|                                                                                                                                                                                      |                                                                                                                                                                                                                                                                                                                                                                                                                                                                                                                                                                                                                                                                                                                                                                                                                                                                                                                                                                                                                                                                                                                                                                                                                                                                                                                                                                                                                                                                                                                                                                                                                                                                                                                                                                                                                                                                                                  |
|--------------------------------------------------------------------------------------------------------------------------------------------------------------------------------------|--------------------------------------------------------------------------------------------------------------------------------------------------------------------------------------------------------------------------------------------------------------------------------------------------------------------------------------------------------------------------------------------------------------------------------------------------------------------------------------------------------------------------------------------------------------------------------------------------------------------------------------------------------------------------------------------------------------------------------------------------------------------------------------------------------------------------------------------------------------------------------------------------------------------------------------------------------------------------------------------------------------------------------------------------------------------------------------------------------------------------------------------------------------------------------------------------------------------------------------------------------------------------------------------------------------------------------------------------------------------------------------------------------------------------------------------------------------------------------------------------------------------------------------------------------------------------------------------------------------------------------------------------------------------------------------------------------------------------------------------------------------------------------------------------------------------------------------------------------------------------------------------------|
| <b>Manuscript Number:</b>                                                                                                                                                            | PONE-D-23-43746                                                                                                                                                                                                                                                                                                                                                                                                                                                                                                                                                                                                                                                                                                                                                                                                                                                                                                                                                                                                                                                                                                                                                                                                                                                                                                                                                                                                                                                                                                                                                                                                                                                                                                                                                                                                                                                                                  |
| <b>Article Type:</b>                                                                                                                                                                 | Research Article                                                                                                                                                                                                                                                                                                                                                                                                                                                                                                                                                                                                                                                                                                                                                                                                                                                                                                                                                                                                                                                                                                                                                                                                                                                                                                                                                                                                                                                                                                                                                                                                                                                                                                                                                                                                                                                                                 |
| <b>Full Title:</b>                                                                                                                                                                   | Crop Damage by Nonhuman Primates: Quantifying the Keys Parameters of Crop-Raiding events on the Livelihoods of Smallholders in an Agriculture- Forest Mosaic Landscape, Wolaita Zone, Southern Ethiopia                                                                                                                                                                                                                                                                                                                                                                                                                                                                                                                                                                                                                                                                                                                                                                                                                                                                                                                                                                                                                                                                                                                                                                                                                                                                                                                                                                                                                                                                                                                                                                                                                                                                                          |
| <b>Short Title:</b>                                                                                                                                                                  | Crop Damage by Nonhuman Primates                                                                                                                                                                                                                                                                                                                                                                                                                                                                                                                                                                                                                                                                                                                                                                                                                                                                                                                                                                                                                                                                                                                                                                                                                                                                                                                                                                                                                                                                                                                                                                                                                                                                                                                                                                                                                                                                 |
| <b>Corresponding Author:</b>                                                                                                                                                         | Yigrem Kebede Deneke, Msc<br>Wolaita Sodo University<br>Sodo, SODO ETHIOPIA                                                                                                                                                                                                                                                                                                                                                                                                                                                                                                                                                                                                                                                                                                                                                                                                                                                                                                                                                                                                                                                                                                                                                                                                                                                                                                                                                                                                                                                                                                                                                                                                                                                                                                                                                                                                                      |
| <b>Keywords:</b>                                                                                                                                                                     | Anubis baboon; Grivet monkeys; Human-Wildlife conflicts; Non-human primate; Maize damage; Prevention method                                                                                                                                                                                                                                                                                                                                                                                                                                                                                                                                                                                                                                                                                                                                                                                                                                                                                                                                                                                                                                                                                                                                                                                                                                                                                                                                                                                                                                                                                                                                                                                                                                                                                                                                                                                      |
| <b>Abstract:</b>                                                                                                                                                                     | Crop damage caused by non-human primates poses a significant challenge to wildlife conservation efforts. This study aims to assess primates foraging behavior and the extent of maize damage in 25 small (10x10m) maize fields, including both protected and non-protected fields. Data were collected over a twelve-month period spanning 2020 and 2021 in the Sodo Zuriya and Damot Gale regions in the Southern Highlands of Ethiopia. Farmers reported that olive baboons, porcupines, and grivet monkeys were the most notorious crop raiders. Baboons and grivet monkeys were found to attack maize more frequently in June, July, and August. Baboons primarily targeted maize in the morning, while grivet monkeys did so in the afternoon. Notably, primate raids were more common in maize fields located closer to the forest edge than in those situated farther away. The average maize yield losses due to nonhuman primate damage amounted to 43.14% and 31.4% in the protected and non-protected fields, respectively. Within this figure, 43.14% of the damage occurred in the protected fields situated 50 m from the forest edge. Conversely, non-protected fields experienced lower rates of damage: 14.42%, 13.18%, 3.7%, and 0.1% at distances of 50 m, 100 m, 200 m, and 300 m from the forest edge, respectively. Camera traps recorded 47 photos of baboons, 21 photos of grivet monkeys, and documented 8 primate crop foraging events. Consequently, our study concluded that maize fields positioned within 50 meters of the forest edge faced significant primate raids. Despite the utilization of wire mesh fencing, it displayed limited effectiveness in deterring olive baboons and grivet monkeys. Furthermore, while guarding is assumed to be an efficient protective strategy, our findings suggest its ineffectiveness when not implemented continuously. |
| <b>Order of Authors:</b>                                                                                                                                                             | Yigrem Kebede Deneke, Msc<br>Aberham Megaze, PhD<br>Wondimagegehu Tekalegn, PhD<br>Taye Dobamo, MSc<br>Herwig Leirs, PhD                                                                                                                                                                                                                                                                                                                                                                                                                                                                                                                                                                                                                                                                                                                                                                                                                                                                                                                                                                                                                                                                                                                                                                                                                                                                                                                                                                                                                                                                                                                                                                                                                                                                                                                                                                         |
| <b>Additional Information:</b>                                                                                                                                                       |                                                                                                                                                                                                                                                                                                                                                                                                                                                                                                                                                                                                                                                                                                                                                                                                                                                                                                                                                                                                                                                                                                                                                                                                                                                                                                                                                                                                                                                                                                                                                                                                                                                                                                                                                                                                                                                                                                  |
| <b>Question</b>                                                                                                                                                                      | <b>Response</b>                                                                                                                                                                                                                                                                                                                                                                                                                                                                                                                                                                                                                                                                                                                                                                                                                                                                                                                                                                                                                                                                                                                                                                                                                                                                                                                                                                                                                                                                                                                                                                                                                                                                                                                                                                                                                                                                                  |
| <b>Financial Disclosure</b>                                                                                                                                                          | Yes                                                                                                                                                                                                                                                                                                                                                                                                                                                                                                                                                                                                                                                                                                                                                                                                                                                                                                                                                                                                                                                                                                                                                                                                                                                                                                                                                                                                                                                                                                                                                                                                                                                                                                                                                                                                                                                                                              |
| Enter a financial disclosure statement that describes the sources of funding for the work included in this submission. Review the <a href="#">submission guidelines</a> for detailed |                                                                                                                                                                                                                                                                                                                                                                                                                                                                                                                                                                                                                                                                                                                                                                                                                                                                                                                                                                                                                                                                                                                                                                                                                                                                                                                                                                                                                                                                                                                                                                                                                                                                                                                                                                                                                                                                                                  |

requirements. View published research articles from [PLOS ONE](#) for specific examples.

This statement is required for submission and **will appear in the published article** if the submission is accepted. Please make sure it is accurate.

#### Funded studies

Enter a statement with the following details:

- Initials of the authors who received each award
- Grant numbers awarded to each author
- The full name of each funder
- URL of each funder website
- Did the sponsors or funders play any role in the study design, data collection and analysis, decision to publish, or preparation of the manuscript?

Did you receive funding for this work?

Please add funding details as follow-up to "**Financial Disclosure**

Enter a financial disclosure statement that describes the sources of funding for the work included in this submission. Review the [submission guidelines](#) for detailed requirements. View published research articles from [PLOS ONE](#) for specific examples.

This statement is required for submission and **will appear in the published article** if the submission is accepted. Please make sure it is accurate.

The funders has no role in the study design, data collection and analysis, decision to publish, or preparation of the manuscript

|                                                                                                                                                                                                                                                                                                                                                                                                                                                                                                                                                                                                                                                                                                                                                                                                                                                                                                                                                                                                                                                                                                                                                                                                  |                                                                     |
|--------------------------------------------------------------------------------------------------------------------------------------------------------------------------------------------------------------------------------------------------------------------------------------------------------------------------------------------------------------------------------------------------------------------------------------------------------------------------------------------------------------------------------------------------------------------------------------------------------------------------------------------------------------------------------------------------------------------------------------------------------------------------------------------------------------------------------------------------------------------------------------------------------------------------------------------------------------------------------------------------------------------------------------------------------------------------------------------------------------------------------------------------------------------------------------------------|---------------------------------------------------------------------|
| <p><b>Funded studies</b></p> <p>Enter a statement with the following details:</p> <ul style="list-style-type: none"> <li>• Initials of the authors who received each award</li> <li>• Grant numbers awarded to each author</li> <li>• The full name of each funder</li> <li>• URL of each funder website</li> <li>• Did the sponsors or funders play any role in the study design, data collection and analysis, decision to publish, or preparation of the manuscript?</li> </ul> <p>Did you receive funding for this work?"</p>                                                                                                                                                                                                                                                                                                                                                                                                                                                                                                                                                                                                                                                                |                                                                     |
| <p>Please select the country of your main research funder (please select carefully as in some cases this is used in fee calculation).</p> <p>as follow-up to "<b>Financial Disclosure</b></p> <p>Enter a financial disclosure statement that describes the sources of funding for the work included in this submission. Review the <a href="#">submission guidelines</a> for detailed requirements. View published research articles from <a href="#">PLOS ONE</a> for specific examples.</p> <p>This statement is required for submission and <b>will appear in the published article</b> if the submission is accepted. Please make sure it is accurate.</p> <p><b>Funded studies</b></p> <p>Enter a statement with the following details:</p> <ul style="list-style-type: none"> <li>• Initials of the authors who received each award</li> <li>• Grant numbers awarded to each author</li> <li>• The full name of each funder</li> <li>• URL of each funder website</li> <li>• Did the sponsors or funders play any role in the study design, data collection and analysis, decision to publish, or preparation of the manuscript?</li> </ul> <p>Did you receive funding for this work?"</p> | <p>BELGIUM - BE</p>                                                 |
| <p><b>Competing Interests</b></p>                                                                                                                                                                                                                                                                                                                                                                                                                                                                                                                                                                                                                                                                                                                                                                                                                                                                                                                                                                                                                                                                                                                                                                | <p>The authors have declared that no competing interests exist.</p> |

Use the instructions below to enter a competing interest statement for this submission. On behalf of all authors, disclose any [competing interests](#) that could be perceived to bias this work—acknowledging all financial support and any other relevant financial or non-financial competing interests.

This statement is **required** for submission and **will appear in the published article** if the submission is accepted. Please make sure it is accurate and that any funding sources listed in your Funding Information later in the submission form are also declared in your Financial Disclosure statement.

View published research articles from [PLOS ONE](#) for specific examples.

#### **NO authors have competing interests**

Enter: *The authors have declared that no competing interests exist.*

#### **Authors with competing interests**

Enter competing interest details beginning with this statement:

*I have read the journal's policy and the authors of this manuscript have the following competing interests: [insert competing interests here]*

\* typeset

#### **Ethics Statement**

Enter an ethics statement for this submission. This statement is required if the study involved:

- Human participants
- Human specimens or tissue
- Vertebrate animals or cephalopods
- Vertebrate embryos or tissues

The work (VLIR-UOS, ET2019TEA485A102) was funded by the Flemish Interuniversity Council. I obtained written consent from local farmers and acquired a permit letter from the Wolaita Sodo Zone District and Sub-district Agriculture, Environment, Forest, and Climate Change Regulatory Office (Reference no. WZ/253/2013).

- Field research

Write "N/A" if the submission does not require an ethics statement.

General guidance is provided below.

Consult the [submission guidelines](#) for detailed instructions. **Make sure that all information entered here is included in the Methods section of the manuscript.**

**Format for specific study types**

**Human Subject Research (involving human participants and/or tissue)**

- Give the name of the institutional review board or ethics committee that approved the study
- Include the approval number and/or a statement indicating approval of this research
- Indicate the form of consent obtained (written/oral) or the reason that consent was not obtained (e.g. the data were analyzed anonymously)

**Animal Research (involving vertebrate animals, embryos or tissues)**

- Provide the name of the Institutional Animal Care and Use Committee (IACUC) or other relevant ethics board that reviewed the study protocol, and indicate whether they approved this research or granted a formal waiver of ethical approval
- Include an approval number if one was obtained
- If the study involved *non-human primates*, add *additional details* about animal welfare and steps taken to ameliorate suffering
- If anesthesia, euthanasia, or any kind of animal sacrifice is part of the study, include briefly which substances and/or methods were applied

**Field Research**

Include the following details if this study involves the collection of plant, animal, or other materials from a natural setting:

- Field permit number
- Name of the institution or relevant body that granted permission

**Data Availability**

Authors are required to make all data underlying the findings described fully available, without restriction, and from the time of publication. PLOS allows rare exceptions to address legal and ethical concerns. See the [PLOS Data Policy](#) and [FAQ](#) for detailed information.

Yes - all data are fully available without restriction

A Data Availability Statement describing where the data can be found is required at submission. Your answers to this question constitute the Data Availability Statement and **will be published in the article**, if accepted.

**Important:** Stating 'data available on request from the author' is not sufficient. If your data are only available upon request, select 'No' for the first question and explain your exceptional situation in the text box.

Do the authors confirm that all data underlying the findings described in their manuscript are fully available without restriction?

**Describe where the data may be found in full sentences. If you are copying our sample text, replace any instances of XXX with the appropriate details.**

- If the data are **held or will be held in a public repository**, include URLs, accession numbers or DOIs. If this information will only be available after acceptance, indicate this by ticking the box below. For example: *All XXX files are available from the XXX database (accession number(s) XXX, XXX).*
- If the data are all contained **within the manuscript and/or Supporting Information files**, enter the following: *All relevant data are within the manuscript and its Supporting Information files.*
- If neither of these applies but you are able to provide **details of access elsewhere**, with or without limitations, please do so. For example:

*Data cannot be shared publicly because of [XXX]. Data are available from the XXX Institutional Data Access / Ethics Committee (contact via XXX) for researchers who meet the criteria for access to confidential data.*

*The data underlying the results presented in the study are available from (include the name of the third party*

All relevant data are within the manuscript and its Supporting Information files.

|                                                                                                                                                                                                                                         |                                                                                                                                                                                  |
|-----------------------------------------------------------------------------------------------------------------------------------------------------------------------------------------------------------------------------------------|----------------------------------------------------------------------------------------------------------------------------------------------------------------------------------|
| <p><i>and contact information or URL).</i></p> <ul style="list-style-type: none"><li>• This text is appropriate if the data are owned by a third party and authors do not have permission to share the data.</li></ul> <p>* typeset</p> |                                                                                                                                                                                  |
| Additional data availability information:                                                                                                                                                                                               | Tick here if the URLs/accession numbers/DOIs will be available only after acceptance of the manuscript for publication so that we can ensure their inclusion before publication. |



1 **Crop Damage by Nonhuman Primates: Quantifying the Key Parameters of Crop-Raiding**  
2 **Events on the Livelihoods of Smallholders in an Agriculture–Forest Mosaic Landscape,**  
3 **Wolaita Zone, Southern Ethiopia**

4 Yigrem Deneke<sup>1\*</sup>, Aberham Megaze<sup>1</sup>, Wondimagegnhe Tekalign<sup>2</sup>, Taye Dobamo<sup>2</sup> and Herwig  
5 Leirs<sup>2</sup>

6 <sup>1</sup>Wolaita Sodo University, College of Natural Sciences, Department of Biology, P.O. box 138,  
7 Wolaita Sodo, Ethiopia

8 <sup>2</sup>University of Antwerp, Department of Biology, Evolutionary Ecology Group, Universiteitsplein  
9 1, 2610 Wilrijk, Belgium

10 \* Corresponding author, email: [yigremk@gmail.com](mailto:yigremk@gmail.com)

11 **Abstract**

12 Crop damage caused by non-human primates poses a significant challenge to wildlife  
13 conservation efforts. This study aims to assess primates foraging behavior and the extent of  
14 maize damage in 25 small (10x10m) maize fields, including both protected and non-protected  
15 fields. Data were collected over a twelve-month period spanning 2020 and 2021 in the Sodo  
16 Zuriya and Damot Gale regions in the Southern Highlands of Ethiopia. Farmers reported that  
17 olive baboons, porcupines, and grivet monkeys were the most notorious crop raiders. Baboons  
18 and grivet monkeys were found to attack maize more frequently in June, July, and August.  
19 Baboons primarily targeted maize in the morning, while grivet monkeys did so in the afternoon.  
20 Notably, primate raids were more common in maize fields located closer to the forest edge than  
21 in those situated farther away. The average maize yield losses due to nonhuman primate damage  
22 amounted to 43.14% and 31.4% in the protected and non-protected fields respectively. Within  
23 this figure, 43.14% of the damage occurred in the protected fields situated 50 m from the forest  
24 edge. Conversely, non-protected fields experienced lower rates of damage: 14.42%, 13.18%,  
25 3.7%, and 0.1% at distances of 50 m, 100 m, 200 m, and 300 m from the forest edge,  
26 respectively. Camera traps recorded 47 photos of baboons, 21 photos of grivet monkeys, and  
27 documented 8 primate crop foraging events. Consequently, our study concluded that maize fields  
28 positioned within 50 meters of the forest edge faced significant primate raids. Despite the  
29 utilization of wire mesh fencing, it displayed limited effectiveness in deterring olive baboons and  
30 grivet monkeys. Furthermore, while guarding is assumed to be an efficient protective strategy,  
31 our findings suggest its ineffectiveness when not implemented continuously.

32 **Key words:** Anubis baboon, Grivet monkeys, Human-Wildlife conflicts, **Non-human primate,**  
33 Maize damage, Prevention method

34

35 **Introduction**

36 Non-human primates that attack subsistence farmers' crops are worrisome since they endanger  
37 farmers' livelihoods [1, 2, 3]. Recognizing and managing human-wildlife conflict resulting from  
38 crop raiding is a critical conservation issue [4, 5].

39 The Sodo Zuriya and Damot Gale Community Protected Areas were established in January 2006  
40 through a collaboration between the Sodo community and World Vision Ethiopia. The aim was  
41 to restore and protect the montane high-forest on the slopes of Mount Damota in the Southern  
42 Ethiopian Highlands. These mountainous landscapes are known for their large populations of  
43 endemic animal and plant species, making them an intriguing research area for conservation. The  
44 Ethiopian National Biodiversity Institute has identified Mt. Damota in the Wolaita Sodo area of  
45 Southern Ethiopia as a priority region for conservation research. According to the institute's  
46 assessment, the area also plays a role in global climate regulation [Institute of Biodiversity  
47 Conservation, 2005 (6)].

48 Our study assesses the extent of primate damage to maize crops in human-dominated forest-  
49 agricultural mosaic landscapes in Southern Ethiopia. The land is collectively owned by five Sodo  
50 Zuriya and Damot Gale Communities, who safeguarded the site and obtained land user-rights  
51 certificates from the Ethiopian Government in 2006. Furthermore, the Ethiopian government has  
52 supported the community's ownership of carbon rights trading, allowing them to earn revenue  
53 from carbon offsets. Cooperatives were established to manage the protected areas. There are  
54 reports of several wild herbivorous large mammals in the area damaging maize fields.

55 Our study combines a camera trap approach with a community-based farmer's participatory  
56 study. It is relevant and timely, as the communities around Mt. Damota have begun to protect  
57 and coexist with nature and have a good understanding of human-wildlife conflict. Prevention  
58 measures are crucial to avoid crop damage by primates on community farms. We evaluate  
59 primate crop feeding events and measure the extent of maize damage by primates at various  
60 distances from the forest's edge.

61

62

## 63 **Materials and methods**

### 64 **Study area**

65 The study was conducted in the Sodo Zuriya and Damot Gale districts, located approximately at  
66 6.54°N 37.45°E through 6.9°N 37.75°E in the Highlands of Southern Ethiopia. The study sites  
67 included the Gurumu Woyde, Kokate Marachere, Konasa Pulasa, Damot Waja, and Dalbo  
68 Wogene sub-districts (see Fig. 1). The study area covers 380 km<sup>2</sup> and is primarily situated atop  
69 Mt. Damota. This region experiences a dry period from October to March and a wet season from  
70 April to September, receiving 1450 to 1800 mm of rainfall, respectively [7]. The maximum  
71 rainfall occurs between June and September, with shorter rains falling in March and April [7].  
72 The temperature ranges from 16°C to 24°C between the wet and dry seasons. The site is  
73 characterized by rugged topography and diverse agro-ecology, fauna, and flora. It encompasses  
74 both closed forest and open forest areas.

75 The vegetation is marked by various types, including evergreen needle-leaved, deciduous needle-  
76 leaved, evergreen broadleaved, and deciduous broadleaved forests, mixed with shrubland,  
77 herbaceous vegetation, herbaceous wetland, moss and lichen, sparse/bare vegetation, and  
78 cropland [7]. Dominant plant species in this area include *Syzygium guineense* (woodland  
79 waterberry), *Juniperus procera* (African juniper), *Croton macrostachyus* (Broad-Leaved  
80 Croton), *Erica arborea* (briar root), *Olea europaea* (common olive), and *Acacia hockii* (Shittim  
81 Wood) [7]. The region is home to various large and medium-sized mammals, such as olive  
82 baboons (*Papio anubis*), grivet monkeys (*Chlorocebus aethiops*), duikers (*Sylvicapra grimmia*),  
83 common bushbucks (*Tragelaphus scriptus*), Guenther's dikdik (*Madoqua guentheri*), and  
84 porcupines (*Hystrix cristata*). Predators include golden jackals (*Canis aureus*), black-backed  
85 jackals (*Canis mesomelas*), leopards (*Panthera pardus*), African civets (*Civettictis civetta*), and  
86 spotted hyenas (*Crocuta crocuta*) [7]. The entire area sustains a population of 16,342 people [8].

87 The landholding of farmers in Mount Damota is very small. The minimum and maximum sizes  
88 of landholding are 0.06 and 1.75 hectares, with an average size of 0.5 hectares [9]. Subsistence  
89 farming is the primary source of income for the local population, with crops such as potato  
90 (*Solanum tuberosum*), sweet potato (*Ipomoea batatas*), wheat (*Triticum aestivum*), barley  
91 (*Hordeum vulgare*), false banana (*Ensete ventricosum*), taro (*Colocasia esculenta*), banana  
92 (*Musa acuminata*), maize (*Zea mays*), and common beans (*Phaseolus vulgaris*) [7]. Maize fields

93 in these areas are very small (e.g.10x10m) and are connected with fields with different crops.  
94 Maize fields were selected for this study to assess the extent of damage caused by non-human  
95 primates.

## 96 **Experimental setup**

97 We set up our study using 25 fields. Ten fields were situated 50 meters from the forest edge and  
98 were used to compare protective measures in the villages of Gurumu Woide and Kokate  
99 Marachare. The protected study plots were safeguarded using wire mesh, human guardians,  
100 scarecrows, and thorny bushes, while the non-protected fields remained open/control.  
101 Furthermore, we set up a total of fifteen non-protected maize study plots (see-Table 1), including  
102 Gurumu Woide, Kokate Marachare, Delbo Wogene, Damot Waja, and Konasa Pulasa. The study  
103 plots were located at varying distances: 100 meters, 200 meters, and 300 meters from the forest  
104 edge.

105 Each study field, we designated a study plot measuring 10m x 10m (see-Table 1). Within these  
106 study plots, we planted the high-yielding maize variety BH-546, well-suited for the region's  
107 agro-ecology. Maize seeds were sown early in the rainy season, typically in April, reaching the  
108 milky stage in late July and ripening by mid-August, with harvesting in September. Prior to  
109 sowing, oxen-drawn plows were used to prepare the fields by creating rows. Initially, 580 seeds  
110 were sown in each study plots in both the 2020 and 2021 maize cropping seasons. However, in  
111 one field (Field no. 25) seeds were removed or added by the farmer resulting in 532 seeds (19  
112 rows x 28 seeds) during the 2020 maize cropping season and 627 seeds (19 rows x 33 seeds)  
113 during the 2021 maize cropping season. Each hole received one seed, with a planting distance of  
114 40 cm x 30 cm, while maintaining a distance of at least 50 meter between one maize study plot  
115 and the next.

116 All cultivation practices, including fertilizer application, cultivation, and weeding, were carried  
117 out as usual. However, non-uniform germination of the sown maize seeds resulted in varying  
118 maize harvests across different plots.

119 ~~In this study, we collected data using (1) Farmer observation and reports (2) Camera traps,~~

120

121 **Farmer observation and reports**

122 Data collection was carried out by farmers who had received training from researchers. These  
123 trained farmers possessed a clear understanding of the nature of Crop Foraging or Raiding  
124 Events (CFE/CRE) in primates. All trained farmers monitored and assessed the CFE/CRE of  
125 baboons and grivet monkeys. Each farm was involved in this project for two maize harvest  
126 seasons (April to August 2020 and 2021 years). The project compensated the participating  
127 farmers with monthly payments ranging from 9.5 to 28.5 USD. At the end of each maize  
128 growing season, the project paid 19 USD to each of the 25 farmers for their participation in both  
129 years (2020 and 2021).

130 Researchers defined the primate crop foraging or crop raid event (CFE/CRE) to potential  
131 aspiring farmers as follows:

132 *CFE /CRE is defined as when one or more individuals of a species entered (i.e. crossed a field  
133 boundary) and make trampling the field and left the field (CRE), and interacted with one or more  
134 maize stem and eat the stem (CFE). The CFE/CRE episode begins when the first primate enters  
135 the field; eat the stem and ends when the last primate leaves the farm. The duration is measured  
136 in seconds using a digital stopwatch. Primate age categories are adult (full species-sex-specific  
137 size), sub-adult (not fully grown, beyond infant development, exhibits independent behaviour  
138 frequently), or infant (developmentally small and dependent, carried frequently, maintains close  
139 proximity to adults).*

140 Farmers responded to the following questions: (1) What is the extent of primate damage to maize  
141 on protected and non-protected fields? (2) When and during which months do primates raid  
142 maize crops? (3) How long do primates typically stay during their maize raids? (4) How  
143 frequently and at what times do farmers report primate incursions? (5) Which crop-feeding  
144 species have farmers reported encountering? (6) What is the extent of primate maize damage on  
145 fields located at a distance? (7) How many individual primates raided maize and entered fields?  
146 (8) In what proportion do multiple and single primate raid events occur? (9) How many  
147 individual primates typically visit maize fields? (10) In which age categories are maize crop-  
148 raiding primates typically found?

149 Data were also collected regarding the presence or absence of humans on fields, the nature of on-  
150 field human activity, the extent of guarding behavior, and responses to crop-raiding primates.

151 Crop damage was determined by counting stems damaged by primates. Trained farmers assessed  
152 and counted the damage caused by primates to maize daily at 18:00 hours. All data collection  
153 adhered to institutional ethics requirements, with Reference No. WSU15/12/915 establishing  
154 ethical guidelines for social and primate research. This work was conducted with the consent and  
155 support of zone administration, village councils, and participating farmers.

### 156 **Camera traps**

157  
158 To gather information on the timing, frequency, and location of feeding behavior by olive  
159 baboons and grivet monkeys within the 25 study plots, we utilized Bushnell camera detection  
160 equipment (Browning trail camera Model No BTC-6HDX).

161 These motion-trigger cameras were configured to capture and store data, including the date, time,  
162 location, and temperature for each photo. The cameras were set to take only one photo per  
163 trigger, with a 2-second interval between triggers [11]. Cameras were securely housed and  
164 locked in metal cases. A potential CFE/CRE was recorded when one or more individuals olive  
165 baboons and grivet monkeys were merely present in the field [11]. An actual CFE was  
166 documented if the photo or video indicated physical manipulation and/or consumption of crop  
167 items [11, 12]. An interval of more than an hour between captured images was considered as an  
168 independent CFE [11]. During the course of this project, different camera traps were installed  
169 and dismantled on different days, resulting in varying numbers of trap days for each unit.

170 Cameras were installed on each study plot. We used 30mm x 30mm stainless steel wire mesh  
171 with a wire diameter of 1.6 mm and a height of 2.5 meters. For data storage, we utilized 16GB  
172 and 32GB Class 4 SDHC memory cards for each camera. Farmers monitored the camera traps to  
173 prevent theft. Data from the camera traps were collected from April to September in both 2020  
174 and 2021, with cameras installed in each of the 25 maize fields for four consecutive trapping  
175 nights. We installed the cameras for 192 trapping days. During camera installation, we collected  
176 the following information: camera ID, GPS position, date, and altitude. Subsequently, we  
177 downloaded the photos and videos from the camera traps onto a laptop. We checked each  
178 photo/video for the presence of wildlife and other relevant information. We also investigated the  
179 presence of humans and dogs, among other factors. Photos containing baboons and monkeys that

180 could damage the crop were numbered and placed in a digital folder. We cataloged all the saved  
181 photos/videos and associated information in a spreadsheet.

## 182 **Data Analysis**

183  We analyzed the data using SPSS Version 16 for Windows (SPSS Inc., Chicago, USA). The  
184 images captured by the camera traps were interpreted to determine the frequency and timing of  
185 ~~Crop Foraging/CRE Events (CFE/CRE)~~. Descriptive statistics were used for the analysis of crop  
186 feeding data. A chi-square test was used to test the variation in the amount of maize damage by  
187 primates in fields located at a distance. Primate CFE/CRE analysis involved the use of the Mann-  
188 Whitney U test, Spearman's Rank Correlation Coefficient, and the F-test. For the analysis of  
189 primate assaults on maize within both preventive and non-preventive maize fields at different  
190 seasons and crop phenology, we utilized R-Software [13]. The maize damage was reported in  
191 three aspects: the average number of maize stems/cobs affected, the estimated amount of maize  
192 damaged in **kilograms**, and the proportion of maize damage caused by primates in relation to the  
193 expected harvest. To calculate the monetary loss, we converted the market prices for maize crop  
194 per kilogram to US dollars using the prevailing exchange rate at the time of the survey.  
195 Additionally, we estimated that the maize seeds in one maize stalk weighed approximately 0.2 kg  
196 after harvest.

197

198

199

200

201

202

203

204

205

## 206 **Result**

### 207 **Farmers-reported crop feeding or raiding species**

208 All farmers consistently reported that baboons, porcupines, and grivet monkeys were the primary  
209 culprits responsible for the most severe crop damage to maize, and these species exhibited a high  
210 frequency of Crop Foraging/CRE Events (CFE/CRE). Additionally, some farmers ( $N = 10$ )  
211 suggested that bushbuck might also be involved in crop feeding or raiding. However, the  
212 reported CFE/CRE frequency of bushbuck in crop fields was notably low, occurring only 24  
213 times (~~as detailed in~~ Table 2).

### 214 **Farmer-reported maize damage assessments**

215 The average percentage of maize cobs lost by olive baboons in wire mesh, human guard,  
216 scarecrow, and thorny bush setups was 8.23% (equivalent to 72.8 maize stems/cobs), 7.38%  
217 (65.3 maize stems/cobs), 9.82% (86.8 maize stems/cobs), and 9.45% (83.5 maize stems/cobs),  
218 respectively. These fields were located 50 meters from the forest edge. In non-protected fields,  
219 the average percentage of maize cobs lost by olive baboons were 10.04% (88.8 maize  
220 stems/cobs), 1.53% (13.5 maize stems/cobs), 0.4% (3.6 maize stems/cobs), and 0.1% (0.9 maize  
221 stems/cobs) located at 50 meters, 100 meters, 200 meters, and 300 meters from the forest edge,  
222 respectively (~~refer to~~ Table 3).

223 The average percentage of maize cobs lost by grivet monkeys in wire mesh, human guard,  
224 scarecrow, and thorny bush setups were 0, 1.83% (6.3 maize stems/cobs), 3.8% (13 maize  
225 stems/cobs), and 2.63% (9 maize stems/cobs), respectively. These fields were located 50 meters  
226 from the forest edge. In non-protected fields, the average percentage of maize cobs lost by grivet  
227 monkeys were 4.38% (15 maize stems/cobs), 11.65% (39.9 maize stems/cobs), 3.3% (11.3 maize  
228 stems/cobs), and 0, located at 50 meters, 100 meters, 200 meters, and 300 meters from the forest  
229 edge, respectively (refer to Table 3).

230 In total, the average percentage of maize cobs lost by these two primate species in the protected  
231 fields was 43.14% (equivalent to 336.7 maize stems), located at 50 meters from the forest edge.  
232 The average percentage of maize cobs lost by primates in the non-protected fields was 14.42%



233 (103.8 maize stems), 13.18% (53.4 maize stems), 3.7% (14.9 maize stems), and 0.1% (0.9 maize  
234 stems) located at 50 meters, 100 meters, 200 meters, and 300 meters, respectively.

### 235 **Camera trap results**

236 Our cameras recorded 47 photographs of baboons and 21 photographs of grivet monkeys, as  
237 summarized in Table 3. Of the 47 photographs of baboons, only 3 were confirmed as actual  
238 (CFE), while the remaining 44 were potential (CRE). Similarly, out of the 21 photographs of  
239 grivet monkeys, only 2 were confirmed as actual (CFE), with the remaining 19 being potential  
240 (CRE). Notably, the longest CRE event, recorded by camera ID A3 and E1, occurred in  
241 scarecrow and open maize fields (see Table 4, Figure 3).

### 242 **Farmers-reported extent of primate crop damage on protected and open/control fields**

243 The average percentage of maize damaged by Olive baboons in both Gurumu Woide and Kokate  
244 Marachare study sites, as reported by farmers, was 23.62% in wire mesh, 21.03% with a human  
245 guard, 28.15% with a scarecrow, and 27.2% in thorny bush fields, respectively (~~as illustrated in~~  
246 Fig. 4).

247 ~~The results of a one-way ANOVA~~ indicated that the amount of damage in maize fields was  
248 significantly higher in thorny bush fields compared to the levels of damage from wire mesh, a  
249 human guard, and a scarecrow ( $F=292.5$ ,  $df=11$ ,  $p < .001$ , see Figure 4).

250 The average percentage of maize damaged by grivet monkeys in the Kokate Marachare study  
251 site, as reported by farmers, **was 0% in wire mesh**, 24.14% with a human guard, 44.83% with a  
252 scarecrow, and 31.03% in thorny bush fields, respectively (~~as illustrated in~~ Fig. 5).

253 ~~The results of a one-way ANOVA~~ indicated that the amount of damage in maize fields was  
254 significantly higher in thorny bush fields compared to the levels of damage from wire mesh,  
255 human guards, and scarecrows ( $F=5.4$ ,  $df=11$ ,  $p < .005$ , see Figure 5).

### 256 **Time or months of maize raided**

257 According to farmers' responses, a higher frequency of maize cobs being plucked was reported in  
258 July, with  $524 \pm 3.8$  maize cobs in the year 2020 and  $539 \pm 4.6$  maize cobs in the year 2021.  
259 Moderate frequencies of maize raiding were reported in June and August, with  $216 \pm 4.6$  and 64

260  $\pm 2.1$  maize cobs in 2020, and  $240 \pm 5.2$  and  $25 \pm 1.6$  maize cobs in 2021, respectively. The  
261 lowest frequencies of maize raiding occurred in April, May, and September for both 2020 and  
262 2021 (as illustrated in Fig 6).

### 263 **Duration of crop-raiding events**

264 The average raid duration ranged from 15.1 to 18 minutes, with a standard deviation of 0.66.  
265 There was significant difference in raid duration between species, as indicated by the **Kruskal-**  
266 **Wallis** test ( $\chi^2 = 58.62$ , d.f. = 10,  $P < 0.05$ ).

267 Raid durations were significantly shorter when carried out by single individuals (~~median 1~~  
268 ~~minute, SD = 0.42~~) compared to raids by two or more individuals (median 3 minutes, SD =  
269 2.42), as confirmed by the Mann-Whitney U test (~~n (single) = n(two+) = 38~~,  $U = 34.0$ ,  $p <$   
270  $0.001$ ). The majority of Crop Raiding Events (CREs), approximately 70%, lasted between 0.1  
271 and 12 minutes (see Fig 7)

### 272 **Farmers-reported CFE frequency and timing**

273 Farmers observed that baboons typically fed on crops early in the morning, while grivet monkeys  
274 fed on crops throughout the day. According to farmers, neither baboons nor grivet monkeys were  
275 seen eating on crops at night. Baboon Crop Foraging Events (CFEs) occurred throughout the day  
276 but not in a uniform distribution, as revealed by photographic data from five locations (Chi-  
277 square ~~goodness of fit~~:  $\chi^2 = 32.36$ ,  $df = 12$ ,  $p < 0.001$ ). Similarly, Grivet monkey CFEs occurred  
278 throughout the day, also with a non-uniform distribution, based on photographic data from five  
279 locations (~~Chi-square goodness of fit~~:  $\chi^2 = 35.86$ ,  $df = 8$ ,  $p < 0.001$ ). Morning CFEs were more  
280 common in baboons (6:00–7:00 a.m.) than afternoon CFEs (2:00–3:30 p.m.). In contrast, CFEs  
281 were more common in the early afternoon (11:00 a.m.–12:00 p.m.) for grivet monkeys than in  
282 the morning (6:00–7:00 a.m.) during both 2020 and 2021 years. Farmers reported no baboon  
283 CFEs in all five locations between 11:00 a.m. and 6:00 p.m. during both 2020 and 2021 years (as  
284 depicted in Fig. 8).

285

286

## 287 **Primate crop raiding events**

288 A total of 367 primates were observed at the forest edges immediately before or during Crop  
289 Raiding Events (CREs). Out of these, 367 individuals, accounting for 75%, ventured into fields  
290 (refer to Table 5). This included all 75 CREs by Anubis baboons (79%) and 20 CREs by grivet  
291 monkeys (21%). Notably, Anubis baboons were significantly more likely to be found near the  
292 forest edge than grivet monkeys, as indicated by the Kruskal-Wallis test ( $\chi^2 = 263.1$ ,  $df = 15$ ,  $p <$   
293  $0.001$ ). The number of individuals entering a field showed a positive correlation with the number  
294 at the forest edge prior to raiding, which was confirmed by the Spearman's Rank Correlation  
295 Coefficient ( $r_s = 0.434$ ,  $n = 95$ ,  $p = 0.006$ ). This correlation persisted even when humans were  
296 present on the field, with a Spearman's Rank Correlation Coefficient of  $r_s = 0.324$ ,  $n = 59$ , and  $p$   
297  $= 0.04$ . Regarding the composition of CREs, the majority (36.1%) involved three or fewer  
298 individuals, while 47.8% consisted of a single individual or a pair. Only 16.1% of CREs  
299 involved more than five individuals (as illustrated in Fig. 9). It's worth noting that baboons  
300 raided in significantly larger groups than other species, as shown by the Kruskal-Wallis test ( $\chi^2 =$   
301  $41.57$ ,  $df = 5$ ,  $p < 0.001$ ); however, most baboon raiding groups were small, with 78%  
302 comprising fewer than five individuals. On the other hand, grivet monkeys were more likely to  
303 raid alone, according to the Kruskal-Wallis test ( $\chi^2 = 88.01$ ,  $df = 5$ ,  $p < 0.001$ ).

## 304 **Multiple versus Single raid events**

305 A significantly greater proportion of raids (64%;  $n = 61$ ) occurred in groups rather than as single  
306 raids, as confirmed by the Chi-square test ( $\chi^2 = 15.9$ ,  $df = 4$ ,  $p = 0.003$ ). Among the group raids,  
307 67% consisted of either 2-CRE or 3-CRE groupings, indicating a diverse pattern of multiple-  
308 CRE profiles for both grivet monkeys and baboons (as depicted in Fig 10). On the other hand,  
309 single raids accounted for 36% ( $n = 34$ ) and were more likely to involve a single raiding  
310 individual. It's worth noting that the extent of maize crop damage per CRE differed significantly  
311 between single raids and group raids, as evidenced by the F-test ( $F = 22.17$ ,  $df = 1$ ,  $p < 0.001$ ).

## 312 **Primate field visit and crop raiding events**

313 Seventy-five percent of primate field visits (comprising 22.3% baboons and 26.1% grivets) did  
314 not involve crop raiding at all, as illustrated in Fig 12. Among the visits that did include crop  
315 raiding, it was observed that 76% more baboon visits involved multiple crop-raiding events

316 rather than a single event. In the case of grivets, 53% more visits involved multiple events, as  
317 confirmed by the Chi-square test (baboon  $\chi^2_1 = 11.63$ ,  $df = 1$ ,  $p < 0.001$ ; Grivet  $\chi^2_1 = 16.00$ ,  
318  $df = 1$ ,  $p < 0.001$ ; as depicted in Fig 11 and Fig-12).

### 319 **Age categories composition of crop-raiding primates**

320 Significantly more adults were observed on study plots during CREs compared to sub-adults, and  
321 more sub-adults were observed than infants. These differences were statistically significant  
322 (Mann-Whitney U tests: n (sub-adult) = 118, n (adult) = 216,  $U = 1653.5$ ,  $p < 0.001$ ; n (infant) =  
323 33, n (sub-adult) = 118,  $U = 952.0$ ,  $p = 0.510$ ). This age category distribution was consistent for  
324 each primate species, as confirmed by a Chi-square test ( $\chi^2 = 71.4$ ,  $df = 1$ ,  $p < 0.001$ ) (refer to  
325 Table 6). Nearly 58% (n = 55) of raiders were single adults, and the majority of adults were  
326 present in 42% of CREs involving multiple individuals (n = 40). Baboons exhibited mixed age-  
327 category raiding groups significantly more frequently than grivet monkeys (Kruskal-Wallis test,  
328  $\chi^2 = 58.05$ ,  $df = 5$ ,  $p < 0.001$ ), and baboon raiding groups were more diverse (Kruskal-Wallis  
329 test,  $\chi^2 = 10.88$ ,  $df = 4$ ,  $p = 0.028$ ). At least one infant was observed during six baboon raids.  
330 Most baboon and grivet raiders were accompanied by an adult during their raids. Almost two-  
331 thirds of baboon raiding groups included one or more sub-adults. All on-field adult and sub-adult  
332 primates damaged at least one crop stem. While infants occasionally interacted with crops by  
333 pulling or biting stems, they often traveled or rested near an adult female or engaged in play  
334 behavior with other infants or sub-adults, suggesting they were not anxious during CREs. Female  
335 primates with infants were particularly vigilant on fields; they were usually the first to return to  
336 the forest while carrying their infants and the first to flee in response to human actions. The sex  
337 of raiding individuals was not reliably determined for analysis; however, counts of male (n = 38)  
338 and female (n = 14) adult baboons on-field during CREs did not significantly differ (Chi-square  
339 test,  $\chi^2 = 29.45$ ,  $df = 1$ ,  $p < 0.001$ ). While significantly more maize stems were damaged by  
340 mixed-age groups than by adults-only groups, the former groups also comprised more  
341 individuals, traveled further onto fields, and raided for longer durations. These findings were  
342 supported by Mann-Whitney U tests (n (adults) = 10, n(mixed) = 36: stems  $U = 2840.5$ ,  $p =$   
343  $0.021$ ; individuals  $U = 20.5$ ,  $p = 0.367$ ; maximum distance  $U = 24.5$ ,  $p = 1.000$ ; median distance  
344  $U = 429.0$ ,  $p = 1.000$ ; duration  $U = 528.5$ ,  $p < 0.001$ ).

345

346

## 347 Discussion

348 Numerous primate species have been involved in crop raids, as documented in various studies  
349 [14, 15, 16, 17, 18, 19]. In this study, the average maize yield losses attributed to nonhuman  
350 primate damage were estimated at 43.14% and 31.4% in the protected and non-protected fields,  
351 respectively, equivalent to 1704.4 maize stems/cobs (340.8 kg) per hectare. Among these losses,  
352 43.14% occurred in protected fields located 50 m from the forest edge. In contrast, non-protected  
353 fields experienced lower damage percentages: 14.42%, 13.18%, 3.7%, and 0.1% at distances of  
354 50 m, 100 m, 200 m, and 300 m from the forest edge, respectively. The resulting monetary losses  
355 for farmer households amounted to 15,864 ETB (equivalent to 444 US Dollars) from an expected  
356 income of 21,600 ETB (equivalent to 608 US Dollars) per hectare.

357 The intensity of crop raids by Anubis baboons varied across different villages, and with no  
358 baboon attacks documented in some of the areas. Baboons, like many other primates [20], do not  
359 uniformly utilize all parts of their home ranges [21, 22, 23]. Their area use patterns are  
360 influenced by factors such as food distribution, sleeping sites or refuge availability, water access,  
361 and the presence of predators [21, 23, 24]. This observation aligns with findings in reference  
362 [25], suggesting that primate crop-foraging decisions are influenced by crop nutritional quality,  
363 spatial and temporal crop availability in comparison to wild food resources. The phenomenon of  
364 maize raiding appeared impervious to variations in forest fruit abundance [26], but it may be  
365 affected by interspecific interactions, such as predator-prey relationships, which can impact  
366 primate foraging behaviors [27].

367 A study by [30] noted an average maize yield loss of 264.1 kg per hectare due to pests (baboons  
368 and pigs), representing 34.2% of the anticipated total yield. In the Budungo Forest Reserves of  
369 Uganda, a study by [2] reported that farmers observed 73% of crop damage caused by primates.  
370 Similarly, in another study [40] conducted in the Taita Hills of Kenya, characterized by a forest-  
371 agricultural mosaic landscape, farmers reported that 87% of the maize crop was attacked by  
372 primates. Our study demonstrates the value of strategically positioned camera traps in providing  
373 insights into various aspects, including recording primate species, their targeted crop types and  
374 growth phases, daily and seasonal patterns of crop-feeding activity, and whether crop-feeding  
375 occurs individually or in groups [11]. However, it's important to acknowledge the limitations of  
376 this method. Although camera traps allow the identification of large, solitary animals with

377 distinct markings [31, 11], we encountered challenges in identifying active crop feeders,  
378 particularly in terms of age and sex classification. Our identifications were likely biased toward  
379 more conspicuous individuals, primarily adult males [11]. Additionally, while camera traps may  
380 capture evidence of primate groups' presence in fields, they may not consistently provide  
381 photographic evidence of actual crop manipulation and consumption, as supported by a reference  
382 [11]. Therefore, many events identified as Crop Foraging Events (CFEs) through camera traps  
383 may not indeed be actual CFEs. To assess the severity of crop damage caused by primate  
384 feeding, we supplemented our research with additional methods, including farmers' reports.  
385 These reports helped monitor baboon and grivet monkey behavior, estimate daily maize damage,  
386 and assess post-harvest damage, as supported by references [32, 33]. Thus, both farmers' reports  
387 and camera trap data offered valuable information by specifying the crops targeted by primate  
388 species and identifying the most frequent and destructive crop-feeding species, such as baboons,  
389 grivet monkeys, porcupines, and bushbucks.

390 Both Anubis baboons and grivet monkeys showed a tendency to cause more damage to maize  
391 fields closer to the forest edge compared to those farther away. The proportion of fields raided by  
392 pests was significantly higher in villages near forests compared to those situated away from the  
393 forests [30, 52]. Primates predominantly raided crops within 10 meters of the farm-forest edges  
394 [17, 34, 35]. The primate raiding groups is influenced by factors like body size, human proximity  
395 from the forest [14].

396 The behavior of primates in the study area was influenced by their habits and foraging, with  
397 baboons on rocky cliffs and caves and grivet monkeys in large trees within the forest. Based on  
398 our field observation, Gurumu Woide has high forest fruit availability and an abundance of steep  
399 cliffs and caves suitable for the existence of a baboon troop. In contrast, Kokate, Konasa, Delbo,  
400 and Waja have lower forest fruit availability and fewer steep cliffs and caves for baboon  
401 survival. This may explain the reduced maize damage by baboons in these study sites. However,  
402 it's worth noting that the specific magnitude of forest fruit availability and the number of cliff  
403 and caves in these study villages remains unknown. In this study, the distance traveled by both  
404 baboons and grivet monkeys to inspect and raid crops did not vary, as both species traveled up to  
405 300 meters. During our observations in the caves, we found that baboons were located at far  
406 distances, approximately 400 meters from the first farmer fields. Consequently, baboons raided

407 the crops that are available close to the forest edge. However, baboons still visited farms located  
408 300 meters from the forest edge, even though maize crop feeding events were infrequent at this  
409 distance. When crops were not available, both species turned to forest foods, foraging on fruits,  
410 leaves, flowers, bark, and roots of forest plant species. In Uganda, grivet monkeys ventured up to  
411 55 meters into crop fields, while baboons reached up to 110 meters [38]. The highest distance  
412 observed was over 700 meters, notably in the Ngangao Forest in Taita Hills, Kenya [40]. This  
413 variation may be influenced by the distribution of households and the number of farms  
414 investigated at different distances [40].

415 In this study, maize raids by primates were reported during the maturation of maize cobs. Our  
416 findings suggest that scarecrows and thorn bushes were generally ineffective in deterring the  
417 return of baboons or grivet monkeys to the fields. Our wire mesh (wire diameter of 1.6 mm and a  
418 mesh size of 30 mm x 30 mm, and a height of 2.5 meters) protection method reduced maize  
419 damage, but it did not deter baboons from raiding the crop, and they quickly habituated. **Kokate**  
420 **Marachare is one of our experimental study sites; in this site, the wire mesh fence was effective**  
421 **in discouraging olive baboons and grivet monkeys from attacking maize crops in fields located**  
422 **50 meters from the forest's edge, but it was not effective in discouraging olive baboons in the**  
423 **Gurumu Woide. We hypothesize that the presence of multiple baboons in the Gurumu Woide**  
424 **study site made them highly vigilant and determined to raid maize crops despite the crop fenced**  
425 **with wire mesh fences.** In contrast, in the Kokate Marachare, where only a single baboon was  
426 involved, hence the wire mesh fence most likely deterred them from crop raiding. According to a  
427 paper by [29], the net wire fences exhibited limited effectiveness against primate raiding in  
428 Budongo Forest Reserve, Uganda. Guarding proved ineffective in preventing baboon attacks on  
429 maize fields in Gurumu Woide due to the absence of continuous field guards. Indeed, field  
430 guards were often absent due to other (social) activities, school attendance **etc.** However, a study  
431 conducted by [30], where it was found that continuous guarding is a principal strategy for  
432 effectively mitigating crop damage by pests. The extended protection duration was particularly  
433 necessary in villages at higher altitudes where maize takes longer to mature [30].

434 Both baboons and grivet monkeys are frequently observed foraging for crops in human-  
435 dominated settings in the study area, with baboons causing more damage than grivet monkeys.  
436 The time of day had differing effects on the crop-foraging patterns of the two species, with

437 baboons foraging more frequently in the morning and grivet monkeys in the afternoon. This  
438 variation in the time of activity might be related to the presence of baboons, which appeared to  
439 deter grivet crop-foraging behavior [28]. Similarly, the time activity pattern varied in different  
440 areas; ~~reference~~ [41] recorded a peak in baboon crop foraging in Zimbabwe between 8 and 10  
441 am, potentially driven by the need to find food upon waking. In contrast, a ~~reference~~ [39] found  
442 that primates in Uganda foraged on crops more frequently between noon and sunset than  
443 between sunrise and noon. To access crops, baboons were observed using a 'sit and wait' strategy  
444 near the edge of crop fields [42]. The more time baboons and grivet monkeys spent close to the  
445 fields, the more likely they were to forage within crops. Furthermore, when they entered crops  
446 during these visits, they were more likely to enter multiple times. Crop raiding wasn't a behavior  
447 practiced by all members of primate social groups, with baboon raiding parties averaging five  
448 individuals [17].

449 In our study, more adults were observed on maize fields during CREs compared to sub-adults.  
450 This varies in different areas; in some studies, adult primates were the main crop raiders, as  
451 referenced in [17, 18, 34, 44], while in other studies, sub-adults were identified as the primary  
452 raiders, as cited in [45, 46, 47, 48]. However, this behavior was rare and observed only in  
453 baboons. Additionally, perceptions of risk may impact the age composition of primate raiding  
454 groups, with adult females with infants raiding the least frequently, likely due to increased  
455 caution, as suggested by [19, 51]. However, the diverse raiding group compositions among  
456 baboons, the presence of infants on fields, and high rates of raiding by baboons suggested that  
457 they were generally more comfortable on fields than other primate species. Although the age-  
458 category composition of raiding groups did influence crop loss, it was a secondary effect related  
459 to group size. The extensive profiles of multiple ~~Crop Raiding Events (CREs)~~ for grivet monkeys  
460 and baboons indicated that these species persistently raid crops when opportunities arise. The  
461 Effective deterrent techniques for farmers should aim to discourage raiding by multiple  
462 individuals, to reduce raiding group sizes, or minimize the time primates spend on fields.  
463 However, it's essential to acknowledge that primates with a substantial history of raiding can  
464 habituate quickly to deterrent techniques. In general, assessing the parameters of ~~Crop Raiding~~  
465 ~~Events (CREs)~~ offers accurate indicators of how comfortable primates are on fields and it  
466 provides essential information for managing and mitigating human-wildlife conflicts.



## 467 **Conclusion**

468 The findings from this study underscore the pressing issue of human-wildlife conflict,  
469 particularly in areas where forests and agriculture intersect. Our combined approach, utilizing  
470 farmers' reports and camera traps to assess the extent of crop damage and **Crop Foraging Events**  
471 **(CFEs)** caused by primate pests, highlights the substantial crop losses observed in our study area.  
472 These losses emphasize the need for continuous vigilance over maize fields, from sowing to  
473 harvest, to deter wild mammal pests. The investment of time, effort, and resources in this  
474 endeavor is justified by the magnitude of crop protection required. Wire mesh fencing was found  
475 to exhibit limited effectiveness in deterring baboons and grivet monkeys. Although guarding is  
476 assumed to be an efficient protective strategy, our study revealed its ineffectiveness when  
477 implementation lacks continuity. In a broader context, understanding the spatio-temporal  
478 dynamics of wildlife-induced crop deprivation, evaluating parameters related to ~~Crop Foraging~~  
479 ~~Events (CRE)~~, and formulating ecologically-based approach for primate pest management and  
480 prevention strategies are crucial steps in mitigating the socio-economic impacts of wild primate  
481 pests originating from forest edges.

## 482 **Acknowledgments**

483 We express our gratitude to the Environment Protection, Forest and Climate Change Regulatory  
484 Office of Wolaita Zone, Ethiopia, for granting us permission to conduct this research. We extend  
485 our sincere appreciation to Tadiwos T/Mariam, Hailemariam Lota, Alana Asale, Metalo Benta,  
486 Tariku Milkano, and Mengistu Shirko for their invaluable field support. We are also thankful to  
487 the University of Antwerp, Belgium, and Wolaita Sodo Universities, Ethiopia, for their support.  
488 Our special thanks go to the farmers, families, and village/sub-district chairpersons of Sodo  
489 Zuriya and Damot Gale for their unwavering support, enthusiasm, and hospitality throughout our  
490 research.

491

492

493

494 **Funding**

495 We sincerely thank VLIR-UOS (Flemish Interuniversities Council) for financial support

496 **Data Availability Statement**

497 The data supporting this study is available in the article

498 **Author Contributions**

499 **Conceptualization:** Yigrem Deneke,

500 **Data curation:** Yigrem Deneke

501 **Formal analysis:** Yigrem Deneke

502 **Investigation:** Yigrem Deneke, Aberham Megaze, Taye Dobamo, Wondimagegnehu Tekalign

503 **Methodology:** Yigrem Deneke

504 **Project administration:** Herwig Leirs

505 **Resources:** Herwig Leirs

506 **Supervision:** Herwig Leirs, Aberham Megaze

507 **Writing – original draft:** Yigrem Deneke

508 **Writing – review & editing:** Yigrem Deneke, Herwig Leirs, Aberham Megaze

509

510 **References**

- 511 1. Hill CM. Conflict of interest between people and baboons: Crop raiding in Uganda. *Inter J*  
512 *Prima*. 2000; 21: 299–315.
- 513 2. Tweheyo M, Hill CM, Obua J. Patterns of crop raiding by primates around the Budongo  
514 Forest Reserve, Uganda. *Wildl Biol*. 2005; 11: 237-247.
- 515 3. Campbell-Smith G, Simanjorang HVP, Leader-Williams N, Linkie M. Local attitudes and  
516 perceptions toward crop-raiding by orangutans (*Pongo abelii*) and other nonhuman primates  
517 in northern Sumatra, Indonesia. *Ameri J Primat*. 2010; 72:866–876.
- 518 4. Sitati NW, Walpole MJ. Assessing farm-based measures for mitigating human-elephant  
519 conflict in Transmara District, Kenya. *Oryx*. 2006; 40: 279–286.
- 520 5. Graham MD, Ochieng T. Uptake and performance of farm-based measures for reducing crop  
521 raiding by elephants (*Loxodonta Africana*) among smallholder farms in Laikipia District,  
522 Kenya. *Oryx*. 2008; 42: 76–82.
- 523 6. Institute of biodiversity conservation (2005). National biodiversity strategy and action plan.  
524 Addis Ababa, Ethiopia.

- 525 7. World Vision Ethiopia. The Sodo Community Managed Reforestation (Forest  
526 Regeneration) Project “Many Species, one Planet, and one Future”). Submission to the  
527 Climate, Community and Biodiversity Standard. Sported by World Vision Australia.  
528 2010; 64p.
- 529 8. CSA. Federal Democratic Republic of Ethiopia Central Statistical Agency. Population and  
530 Housing Census. 2015; Addis Ababa, Ethiopia.
- 531 9. Merkinah MM. Determinants of Choice Decision for Adoption of Conservation Intervention  
532 Practices: The Case of Mt. Damota Sub-Watershed, Wolaita Zone, Ethiopia. *Global Journal*  
533 *of HUMAN-SOCIAL SCIENCE: B Geography, Geo-Sciences, Environmental Science &*  
534 *Disaster Management*. Global Journals Inc. (USA). 2016, Volume 16, ISSN: 0975-587X.
- 535 10. Satellite images. Land use/cover data. 2017, 2018, and 2019; downloaded from USGS/Earth  
536 Explorer website. <https://earthexplorer.usgs.gov>
- 537 11. Zak AA, Riley EP. Comparing the Use of Camera Traps and Farmer Reports to Study Crop  
538 Feeding Behaviour of Moor Macaques (*Macaca maura*). *Int. J. Prima*. 2016; 38(2): 224–  
539 242. <https://doi.org/10.1007/s10764-016-9945-6>.
- 540 12. Acrenaz M, Hearn A, Ross J, Sollmann R, Wilting A. Handbook for wildlife monitoring  
541 using camera-traps. 2012; Kota Kinabalu, Sabah, Malaysia: BBEC II Secretariat
- 542 13. R Core Team. R: A language and environment for statistical computing. R Foundation for  
543 Statistical Computing, Vienna, Austria. 2020; <https://www.R-project.org/>
- 544 14. Wallace, GE, Hill, CM. Crop Damage by Primates: Quantifying the Key Parameters of  
545 Crop-Raiding Events. *PLoS one*. 2012; 7(10): e46636. Doi: 10.1371/ journal.pone.0046636.  
546 PMID: 23056378
- 547 15. Maples WR, Maples MK, Greenhood WF, Walek ML. Adaptations of crop-raiding  
548 baboons in Kenya. *Ameri J Physi Anthrope*. 1976; 45: 309–315.
- 549 16. Crockett CM, Wilson WL. The ecological separation of *Macaca nemestrina* and *M.*  
550 *fascicularis* in Sumatra. In: Lindburg DG, editor. *The macaques: Studies in ecology,*  
551 *behavior and evolution*. 1980; New York: Van Nostrand Reinhold. 148– 181 p.
- 552 17. Warren Y. Olive baboons (*Papio cynocephalus anubis*): Behaviour, ecology and human  
553 conflict in Gashaka Gumti National Park, Nigeria [PhD Thesis]. 2003; Roehampton:  
554 University of Surrey. 308 p.
- 555 18. Priston NEC. Crop-raiding by *Macaca ochreata brunnescens* in Sulawesi: Reality,  
556 perceptions and outcomes for conservation [PhD Thesis]. 2005; Cambridge: University of  
557 Cambridge.

- 558 19. Hockings KJ. Human-chimpanzee coexistence at Bossou, the Republic of Guinea: A  
559 chimpanzee perspective [PhD Thesis]. 2007; Stirling: University of Stirling.
- 560 20. Willems EP., Barton RA, Hill RA. Remotely sensed productivity, regional home range  
561 selection, and local range use by an omnivorous primate. *Behav Ecol*, 2009; 20: 985–992
- 562 21. Cowlshaw G. Trade-offs between foraging and predation risk determine habitat use in a  
563 desert baboon population. *Anim Behav*, 1997b; 53: 667–686.
- 564 22. Pebsworth PA, Macintosh AJJ, Morgan HR, Huffman MA. Factors influencing the ranging  
565 behavior of chacma baboons (*Papio hamadryas ursinus*) living in a human-modified habitat.  
566 *Intern J of Primat*, 2012; 33: 872–887.
- 567 23. Whiten A, Byrne RW, Henzi SP. The behavioural ecology of mountain baboons. *Intern J of*  
568 *Primat*, 1987; 8: 367–388.
- 569 24. Cowlshaw G. Refuge use and predation risk in a desert baboon population. *Anim Behav*,  
570 1997a; 54:241–253.
- 571 25. Hill CH. Crop-raiding. *Intern Encyclo of Primat*. 2017; 10.1002/9781119179313, p1-5. DOI:  
572 10.1002/9781119179313.wbprim0109.
- 573 26. Naughton-Treves L, Treves A, Chapman C, Wrangham, R. Temporal Patterns of Crop-  
574 Raiding by Primates: Linking Food Availability in Croplands and Adjacent Forest. *J Appl*  
575 *Ecol*. 1998; 35 (4): 596-606
- 576 27. Willems EP, Hill RA. Predator-specific landscapes of fear and resource distribution: effects  
577 on spatial range use. *J Ecol*. 2009; 90:546–555.
- 578 28. Findlay, LJ, Hill, RA. Baboon and vervet monkey crop-foraging behaviours on a commercial  
579 South African farm: preliminary implications for damage mitigation. *Hum Wildl Intera*.  
580 2020; 14(3):505–518
- 581 29. Sara SH, Caroline R ,Catherine MH and Wallace GE. crop-raiding deterrents around  
582 budongo forest reserve: an evaluation through farmer actions and perceptions. *Oryx*, 2013;  
583 47: 569 - 577 DOI: <https://doi.org/10.1017/S0030605312000853>
- 584 30. Ango TG, Borjeson L, Senbeta F. Crop raiding by wild mammals in Ethiopia: impacts on the  
585 livelihoods of smallholders in an agriculture–forest mosaic landscape. *Oryx*,  
586 2016;51(3):527–

- 587 537 Fauna & Flora International doi: 10.1017/S0030605316000028.
- 588 31. Wegge P, Chiranjibi PP, Jnawali SR. Effects of trapping effort and trap shyness on estimates  
589 of tiger abundance from camera trap studies. *Anim Conserv*, 2004; 7: 251–256
- 590 32. Hill CM. Crop-raiding by wild vertebrates: The farmer’s perspective in an agricultural  
591 community in western Uganda. *Inter J Pest Manage*. 1997; 43: 77–84.
- 592 33. Linkie M, Dinata Y, Nofrianto A, Leader Williams N. Patterns and perceptions of wildlife  
593 crop raiding in and around Kerinci Seblat National Park, Sumatra. *Anim Conserv*, 2007;  
594 10:127–135. <https://doi.org/10.1111/j.1469-1795.2006.00083.x>
- 595 34. Hansen LK. Influence of forest-farm boundaries and human activity on raiding by the Buton  
596 macaque (*Macaca ochreata brunnescens*) [MSc Dissertation]. 2003; Oxford: Oxford  
597 Brookes University. 46 p.
- 598 35. Priston NEC, Wyper RM, Lee PC. Buton macaques (*Macaca ochreata brunnescens*): Crops,  
599 conflict, and behavior on farms. *Ameri J Primat*. 2012; 74: 29–36.
- 600 36. Wolfheim JH. Primates of the world: Distribution, abundance, and conservation. Seattle. 1983;  
601 University of Washington Press. 831 p.
- 602 37. Nowak RM. Walker’s primates of the world. Baltimore. 1999; The Johns Hopkins University  
603 Press. 224 p.
- 604 38. Reynolds V. The chimpanzees of the Budongo Forest: Ecology, behaviour, and conservation.  
605 2005; Oxford: Oxford University Press. 297 p.
- 606 39. Wallace GE. Monkeys in maize: primate crop-raiding behaviour and developing on-farm  
607 techniques to mitigate human–wildlife conflict. Dissertation, 2010; Oxford Brookes  
608 University, Oxford, United Kingdom.
- 609 40. Siljander Mika, Kuronen Toini, Johansson T, Munyao MN, Pellikka Petri KE. Primates on the  
610 farm – spatial patterns of human–wildlife conflict in forest-agricultural landscape mosaic  
611 in Taita Hills, Kenya. *Appl Geogra*. 2020; 117: 102185. [https://doi.org/10.1016/j.apgeog.2020.102](https://doi.org/10.1016/j.apgeog.2020.102185)  
612 185
- 613 41. Schweitzer C, Gaillard T, Guerbois C, Fritz H, O. Petit O. Participant profiling and pattern of  
614 crop-foraging in chacma baboons (*Papio hamadryas ursinus*) in Zimbabwe: why does  
615 investigating age–sex classes matter? *Inter J Prima*. 2017; 38: 207–223.

- 616 42. Walton BJ, Findlay LJ, Hill RA. Insights into short- and long-term crop-foraging strategies in  
617 a chacma baboon (*Papio ursinus*) from GPS and accelerometer data. *Ecol Evol.* 2021;  
618 11:990–1001. <https://doi.org/10.1002/ece3.7114>
- 619 43. Webber AD. Primate crop raiding in Uganda: Actual and perceived risks around Budongo  
620 Forest Reserve [PhD Thesis]. 2006; Oxford: Oxford Brookes University.
- 621 44. Hockings KJ. Living at the interface: Human-chimpanzee competition, coexistence and  
622 conflict in Africa. *Inter Studi.* 2009; 10: 183–205.
- 623 45. Strum SC. Prospects for management of primate pests. *Revue d'Ecologie (La Terre Et La*  
624 *Vie).* 1994; 49: 295–306.
- 625 46. Forthman QDL. Activity budgets and the consumption of human food in two troops of  
626 baboons, *Papio anubis*, at Gilgil, Kenya. In: Else JG, Lee PC, editors. *Prima ecol conserv.*  
627 1986; Cambridge: Cambridge University Press. 221–228.
- 628 47. Oyaro HO, Strum SC. Shifts in foraging strategies as a response to the presence of agriculture  
629 in a troop of wild baboons at Gilgil, Kenya. *Inter J Prima.* 1984; 5: 371–381.
- 630 48. Saj T, Sicotte P, Paterson JD. Influence of human food consumption on the time budget of  
631 vervets. *Inter J Prima.* 1999; 20: 977–994.
- 632 49. Fairbanks LA. Risk-taking by juvenile vervet monkeys. *Behav.* 1993; 124: 57– 72.
- 633 50. Janson CH, van Schaik CP. Ecological risk aversion in juvenile primates: Slow and steady  
634 wins the race. In: Pereira ME, Fairbanks LA, editors. *Juvenile primates: Life history,*  
635 *development and behavior.* 1993; New York: Oxford University Press. 57–74.
- 636 51. Fairbanks LA, McGuire MT. Maternal protectiveness and response to the unfamiliar in vervet  
637 monkeys. *Ameri J Prima.* 1993; 30: 119–129.
- 638 52. Alemayehu Mamo, Debissa Lemessa, Obsu Hirko Diriba, Debela Hunde. Pattern of crop  
639 raiding by wild large mammals and the resultant impacts vary with distances from forests in  
640 Southwest Ethiopia. *Ecol Evol.* 2021; 11:3203–3209. DOI: 10.1002/ece3.7268. PMID:  
641 [33841777](https://pubmed.ncbi.nlm.nih.gov/33841777/)

642

643

644

645

646 Fig 1. Background vegetation map based on remote sensing data [10]  
647 Fig 2. Various prevention strategies (Wire mesh (A), Human guardian tower (B), Scarecrow (C),  
648 Thorny bush (D)) were assessed in eight experimental maize field sites to evaluate their  
649 effectiveness in deterring crop raiders. The study was conducted in maize field sites located in  
650 Gurumu Woide and Kokate Marachare.

651 Fig 3. The images above depict camera trap captures of various wildlife species observed in  
652 maize field sites located in Damota Mountain, Southern Ethiopia: (A) Anubis baboons (*Papio*  
653 *anubis*) (B) Grivet monkeys (*Chlorocebus aethiops*), (C) Porcupine (*Hystrix cristata*), and (D)  
654 Bushbuck (*Tragelaphus scriptus*)

655 Fig 4. The average of maize stems ( $\approx$ number of cobs) damaged within 10m x 10m study plots by  
656 Olive baboons was examined in relation to various preventive methods at a distance of 50 meters  
657 from the forest edge during the 2020 and 2021 maize cropping seasons and crop phenology in  
658 the Gurumu Woide and Kokate Marachare (GW) sub-district. The boxplot illustrates a  
659 significant difference in crop damage among different prevention methods ( $p < .001$ ).

660 Fig 5. The average of maize stems ( $\approx$ the number of cobs) damaged within 10m x 10m study plots  
661 by grivet monkeys illustrates the relationship with various prevention methods at a distance of 50  
662 meters from the forest edge during the 2020 and 2021 maize cropping seasons and crop  
663 phenology in the Kokate Marachare (KM) sub-district. The boxplot shows a significant  
664 difference in crop damage with different prevention methods ( $p < .005$ ).

665 Fig 6. The frequency of primate maize crop raided during the 2020 and 2021 maize cropping  
666 seasons ( $n = 95$ )

667 Fig 7. Relative frequency of raid durations by primate CREs ( $n = 95$ ).

668 Fig 8. The frequency of baboon and grivet monkey CFEs by time of day ( $N = 95$ ) between April  
669 to September 2020 and 2021 years.

670 Fig 9. Relative frequency of raiding by primate CREs ( $n = 95$ )

671 Fig 10. The frequency distribution of CREs that were single raids or within a series of multiple-  
672 CREs for each of these two primate species ( $n = 95$ )

673  
674 Fig 11. The number of baboon and grivet monkey field visits that did and did not involve crop-  
675 raiding events (CRE) on maize fields in the Highlands of Damota Mountain, April to September  
676 2020 and 2021 years ( $n=367$ )

677  
678 Fig 12. The number of baboon and grivet monkey field visits that involved single- and multi-  
679 crop raiding events on maize fields in the Highlands of Damota Mountain, April to September  
680 2020 and 2021 years ( $n=189$ ).

681

682 Table 1. Maize field and study plot size on the protective and non-protective maize fields

683

| Study sites      | Field number | Maize field size in hectare | Study plot size (10x10m) | Distance to forest edge | Preventive and non-preventive measures |
|------------------|--------------|-----------------------------|--------------------------|-------------------------|----------------------------------------|
| Gurumu Woide     | 1            | 0.01                        | 0.01                     | 50m                     | Wire mesh                              |
|                  | 2            | 0.06                        | 0.01                     | 50m                     | Human guard                            |
|                  | 3            | 0.1                         | 0.01                     | 50m                     | Scarecrow                              |
|                  | 4            | 0.1                         | 0.01                     | 50m                     | Thorny bushy                           |
|                  | 5            | 0.1                         | 0.01                     | 50m                     | Open/control                           |
|                  | 6            | 0.2                         | 0.01                     | 100m                    | Open                                   |
|                  | 7            | 0.3                         | 0.01                     | 200m                    | Open                                   |
|                  | 8            | 0.3                         | 0.01                     | 300m                    | Open                                   |
| Kokate Marachare | 9            | 0.2                         | 0.01                     | 50m                     | Wire mesh                              |
|                  | 10           | 0.2                         | 0.01                     | 50m                     | Scarecrow                              |
|                  | 11           | 0.2                         | 0.01                     | 50m                     | Thorny bushy                           |
|                  | 12           | 0.2                         | 0.01                     | 50m                     | Open/control                           |
|                  | 13           | 0.2                         | 0.01                     | 50m                     | Human guard                            |
|                  | 14           | 0.3                         | 0.01                     | 100m                    | Open                                   |
|                  | 15           | 0.3                         | 0.01                     | 200m                    | Open                                   |
|                  | 16           | 0.3                         | 0.01                     | 300m                    | Open                                   |
| Delbo Wogene     | 17           | 0.2                         | 0.01                     | 100m                    | Open                                   |
|                  | 18           | 0.2                         | 0.01                     | 200m                    | Open                                   |
|                  | 19           | 0.3                         | 0.01                     | 300m                    | Open                                   |
| Damot Waja       | 20           | 0.06                        | 0.01                     | 100m                    | Open                                   |
|                  | 21           | 0.3                         | 0.01                     | 200m                    | Open                                   |
|                  | 22           | 0.3                         | 0.01                     | 300m                    | Open                                   |
| Konasa Pulasa    | 23           | 0.01                        | 0.01                     | 100m                    | Open                                   |
|                  | 24           | 0.3                         | 0.01                     | 200m                    | Open                                   |
|                  | 25           | 0.3                         | 0.01                     | 300m                    | Open                                   |



694 **Table 2.** The comparison of farmer response frequency and CFE/CRE frequency of crop  
695 feeding/raiding species from April to September 2020 and 2021 years

| Pest species                                    | Number of farmers reporting the species | Frequency of CFE/CRE |
|-------------------------------------------------|-----------------------------------------|----------------------|
| Baboon ( <i>Papio anubis</i> )                  | 22                                      | 80                   |
| Grivet monkey ( <i>Chlorocebus aethiops</i> )   | 17                                      | 45                   |
| Porcupine ( <i>Hystrix cristata</i> )           | 25                                      | 75                   |
| Common bushbuck ( <i>Tragelaphus scriptus</i> ) | 10                                      | 24                   |

696

697

698 Table 3. Farmer observation and reported of maize damage assessments (580 maize stem expected per plot except field no. 25 (see the text)  
699

| Study sites         | Field number | Distance to forest | measures     | Olive baboons   |            |            |            |             |            | Grivet monkeys  |            |            |            |              |            |
|---------------------|--------------|--------------------|--------------|-----------------|------------|------------|------------|-------------|------------|-----------------|------------|------------|------------|--------------|------------|
|                     |              |                    |              | Maize cobs loss |            | % damaged  |            | Av. damaged | Av.%       | Maize cobs loss |            | % damaged  |            | Av. damaged  | Av. %      |
|                     |              |                    |              | 2020            | 2021       | 2020       | 2021       | 2020/21     | 2020/21    | 2020            | 2021       | 2020       | 2021       | 2020/21      | 2020/21    |
| Gurumu Woide        | 1            | 50m                | Wire mesh    | 145             | 146        | 16.57      | 16.35      | 145.5       | 16.46      | 0               | 0          | 0          | 0          | 0            | 0          |
|                     | 2            | 50m                | guard        | 127             | 128        | 14.51      | 14.33      | 127.5       | 14.42      | 0               | 0          | 0          | 0          | 0            | 0          |
|                     | 3            | 50m                | Scarecrow    | 165             | 167        | 18.86      | 18.7       | 166         | 18.78      | 0               | 0          | 0          | 0          | 0            | 0          |
|                     | 4            | 50m                | Thorny       | 160             | 161        | 18.29      | 18.03      | 160.5       | 18.16      | 0               | 0          | 0          | 0          | 0            | 0          |
|                     | 5            | 50m                | Open/control | 164             | 168        | 18.74      | 18.81      | 166         | 18.78      | 0               | 0          | 0          | 0          | 0            | 0          |
|                     | 6            | 100m               | Open         | 48              | 54         | 5.48       | 6.05       | 51          | 5.77       | 0               | 0          | 0          | 0          | 0            | 0          |
|                     | 7            | 200m               | Open         | 16              | 13         | 1.83       | 1.46       | 14.5        | 1.64       | 0               | 0          | 0          | 0          | 0            | 0          |
|                     | 8            | 300m               | Open         | 4               | 5          | 0.46       | 0.56       | 4.5         | 0.51       | 0               | 0          | 0          | 0          | 0            | 0          |
| Kokate<br>Marachare | 9            | 50m                | Wire mesh    | 0               | 0          | 0          | 0          | 0           | 0          | 0               | 0          | 0          | 0          | 0            | 0          |
|                     | 10           | 50m                | guard        | 4               | 2          | 0.46       | 0.22       | 3           | 0.34       | 12              | 13         | 3.56       | 3.74       | 12.5         | 3.65       |
|                     | 11           | 50m                | Scarecrow    | 7               | 8          | 0.8        | 0.9        | 7.5         | 0.85       | 25              | 27         | 7.42       | 7.76       | 26           | 7.59       |
|                     | 12           | 50m                | Thorny       | 6               | 7          | 0.69       | 0.78       | 6.5         | 0.74       | 17              | 19         | 5.04       | 5.46       | 18           | 5.26       |
|                     | 13           | 50m                | Open/control | 11              | 12         | 1.26       | 1.34       | 11.5        | 1.3        | 29              | 31         | 8.61       | 8.91       | 30           | 8.76       |
|                     | 14           | 100m               | Open         | 15              | 18         | 1.71       | 2.02       | 16.5        | 1.86       | 11              | 12         | 3.26       | 3.44       | 11.5         | 3.36       |
|                     | 15           | 200m               | Open         | 3               | 4          | 0.34       | 0.45       | 3.5         | 0.39       | 2               | 5          | 0.59       | 1.43       | 3.5          | 1.02       |
|                     | 16           | 300m               | Open         | 0               | 0          | 0          | 0          | 0           | 0          | 0               | 0          | 0          | 0          | 0            | 0          |
| Delbo Wogene        | 17           | 100m               | Open         | 0               | 0          | 0          | 0          | 0           | 0          | 30              | 28         | 8.9        | 8.04       | 29           | 8.47       |
|                     | 18           | 200m               | Open         | 0               | 0          | 0          | 0          | 0           | 0          | 9               | 12         | 2.67       | 3.44       | 10.5         | 3.07       |
|                     | 19           | 300m               | Open         | 0               | 0          | 0          | 0          | 0           | 0          | 0               | 0          | 0          | 0          | 0            | 0          |
| Damot Waja          | 20           | 100m               | Open         | 0               | 0          | 0          | 0          | 0           | 0          | 40              | 42         | 11.9       | 12.1       | 41           | 11.97      |
|                     | 21           | 200m               | Open         | 0               | 0          | 0          | 0          | 0           | 0          | 10              | 10         | 2.97       | 2.87       | 10           | 2.92       |
|                     | 22           | 300m               | Open         | 0               | 0          | 0          | 0          | 0           | 0          | 0               | 0          | 0          | 0          | 0            | 0          |
| Konasa Pulasa       | 23           | 100m               | Open         | 0               | 0          | 0          | 0          | 0           | 0          | 117             | 119        | 34.7       | 34.19      | 118          | 34.45      |
|                     | 24           | 200m               | Open         | 0               | 0          | 0          | 0          | 0           | 0          | 35              | 30         | 10.4       | 8.62       | 32.5         | 9.48       |
|                     | 25           | 300m               | Open         | 0               | 0          | 0          | 0          | 0           | 0          | 0               | 0          | 0          | 0          | 0            | 0          |
| Total               |              |                    |              | <b>875</b>      | <b>893</b> | <b>100</b> | <b>100</b> | <b>884</b>  | <b>100</b> | <b>337</b>      | <b>348</b> | <b>100</b> | <b>100</b> | <b>342.5</b> | <b>100</b> |

700 Table 4. Image data of olive baboon and grivet monkeys by camera traps of twenty five maize fields during 2020 and 2021  
 701

| Study sites      | Camera ID | Distance to forest edge | Preventive and Non-preventive measures | Olive baboon |          | Grivet monkey |          |
|------------------|-----------|-------------------------|----------------------------------------|--------------|----------|---------------|----------|
|                  |           |                         |                                        | CRE          | CFE      | CRE           | CFE      |
| Gurumu Woide     | A1        | 50m                     | Wire mesh                              | 4            | 0        | 0             | 0        |
|                  | A2        | 50m                     | Human guard                            | 10           | 0        | 0             | 0        |
|                  | A3        | 50m                     | Scarecrow                              | 12           | 3        | 0             | 0        |
|                  | A4        | 50m                     | Thorny bushy                           | 6            | 0        | 0             | 0        |
|                  | A5        | 50m                     | Open/control                           | 9            | 0        | 0             | 0        |
|                  | A6        | 100m                    | Open                                   | 3            | 0        | 0             | 0        |
|                  | A7        | 200m                    | Open                                   | 0            | 0        | 0             | 0        |
|                  | A8        | 300m                    | Open                                   | 0            | 0        | 0             | 0        |
| Kokate Marachare | B1        | 50m                     | Wire mesh                              | 0            | 0        | 0             | 0        |
|                  | B2        | 50m                     | Scarecrow                              | 0            | 0        | 1             | 0        |
|                  | B3        | 50m                     | Thorny bush                            | 0            | 0        | 1             | 0        |
|                  | B4        | 50m                     | Open/control                           | 0            | 0        | 1             | 0        |
|                  | B5        | 50m                     | Human guard                            | 0            | 0        | 0             | 0        |
|                  | B6        | 100m                    | Open                                   | 0            | 0        | 1             | 0        |
|                  | B7        | 200m                    | Open                                   | 0            | 0        | 0             | 0        |
|                  | B8        | 300m                    | Open                                   | 0            | 0        | 0             | 0        |
| Delbo Wogene     | C1        | 100m                    | Open                                   | 0            | 0        | 1             | 0        |
|                  | C2        | 200m                    | Open                                   | 0            | 0        | 0             | 0        |
|                  | C3        | 300m                    | Open                                   | 0            | 0        | 0             | 0        |
| Damot Waja       | D1        | 100m                    | Open                                   | 0            | 0        | 1             | 0        |
|                  | D2        | 200m                    | Open                                   | 0            | 0        | 0             | 0        |
|                  | D3        | 300m                    | Open                                   | 0            | 0        | 0             | 0        |
| Konasa Pulasa    | E1        | 100m                    | Open                                   | 0            | 0        | 11            | 2        |
|                  | E2        | 200m                    | Open                                   | 0            | 0        | 2             | 0        |
|                  | E3        | 300m                    | Open                                   | 0            | 0        | 0             | 0        |
| <b>Total</b>     |           |                         |                                        | <b>44</b>    | <b>3</b> | <b>19</b>     | <b>2</b> |

702 **Table 5.** The proportion of the total number of on-field primates during CREs (n = 367) that were  
703 adults, sub-adults, or infants.

704

705

---

Total number of individuals on fields

---

706

Adults                      Sub-adults                      Infants                      Total

707

---

|               |             |            |            |     |
|---------------|-------------|------------|------------|-----|
| Anubis baboon | 151 (57.6%) | 78 (29.8%) | 33 (12.6%) | 262 |
| Grivet monkey | 65 (61.9%)  | 40 (38.1%) | 0 (0%)     | 105 |
| Total         | 216         | 118        | 33         | 367 |

---

708

709

710

711

712

713

714

715

716

717

718

719

720

721

722 **Table 6.** Age-category composition of primate raiding groups during CREs (n = 95).

723

| Composition of crop-raiding group |             |                       |                    |                             |
|-----------------------------------|-------------|-----------------------|--------------------|-----------------------------|
|                                   | Adults only | Adults and sub-adults | Adults and infants | Adults, sub-adults, infants |
| Species                           | % CREs      | % CREs                | % CREs             | % CREs                      |
| Anubis baboon                     | 36          | 45                    | 4.4                | 14.6                        |
| Grivet monkey                     | 68          | 32                    | 0.0                | 0.0                         |

724

725

726

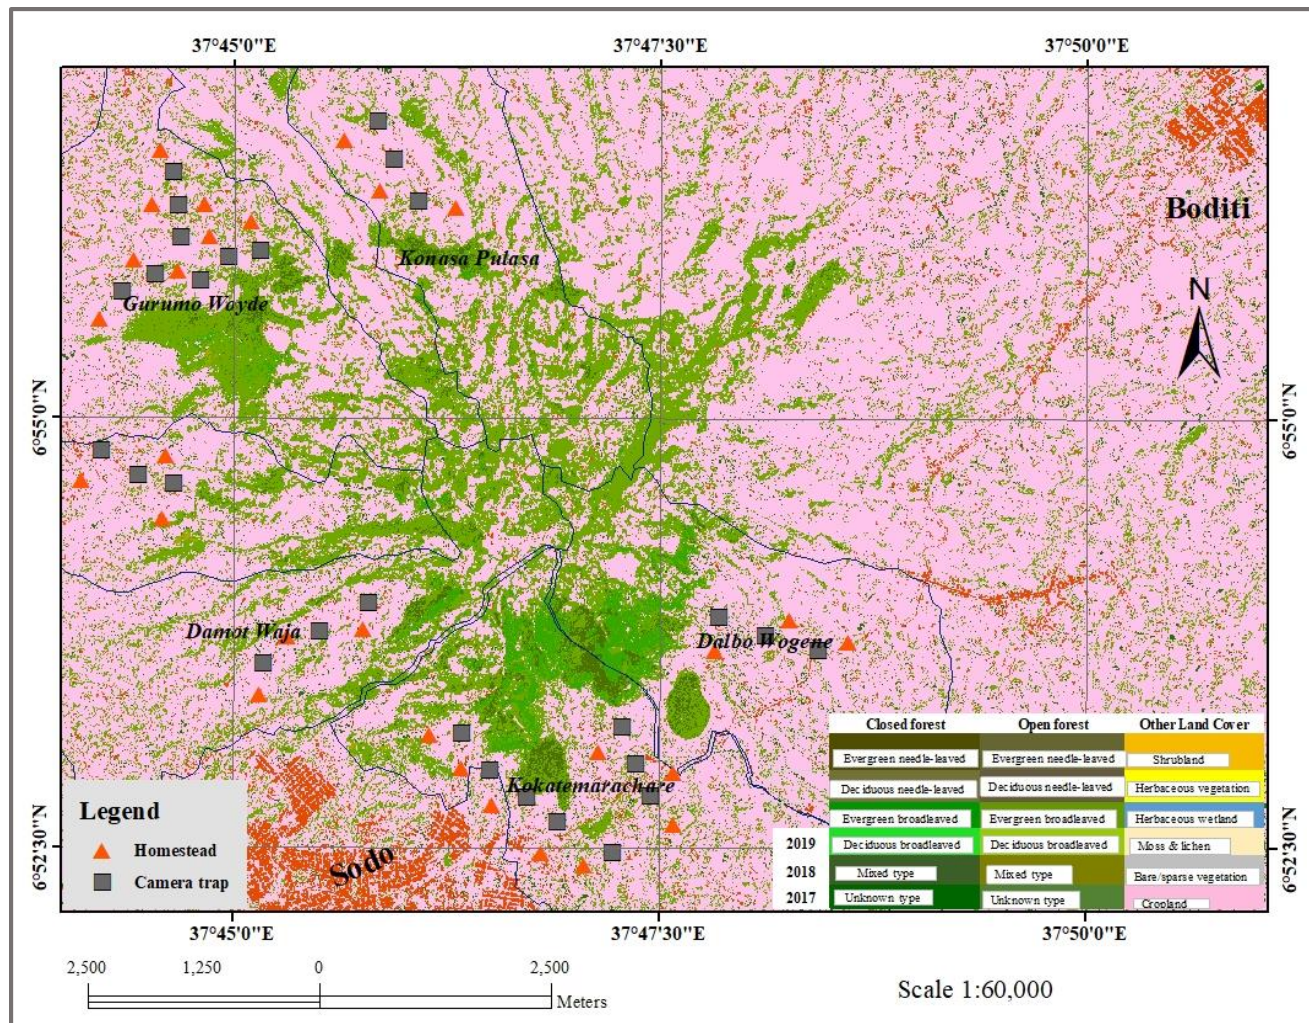

**Fig 1.** Background vegetation map based on remote sensing data [10]

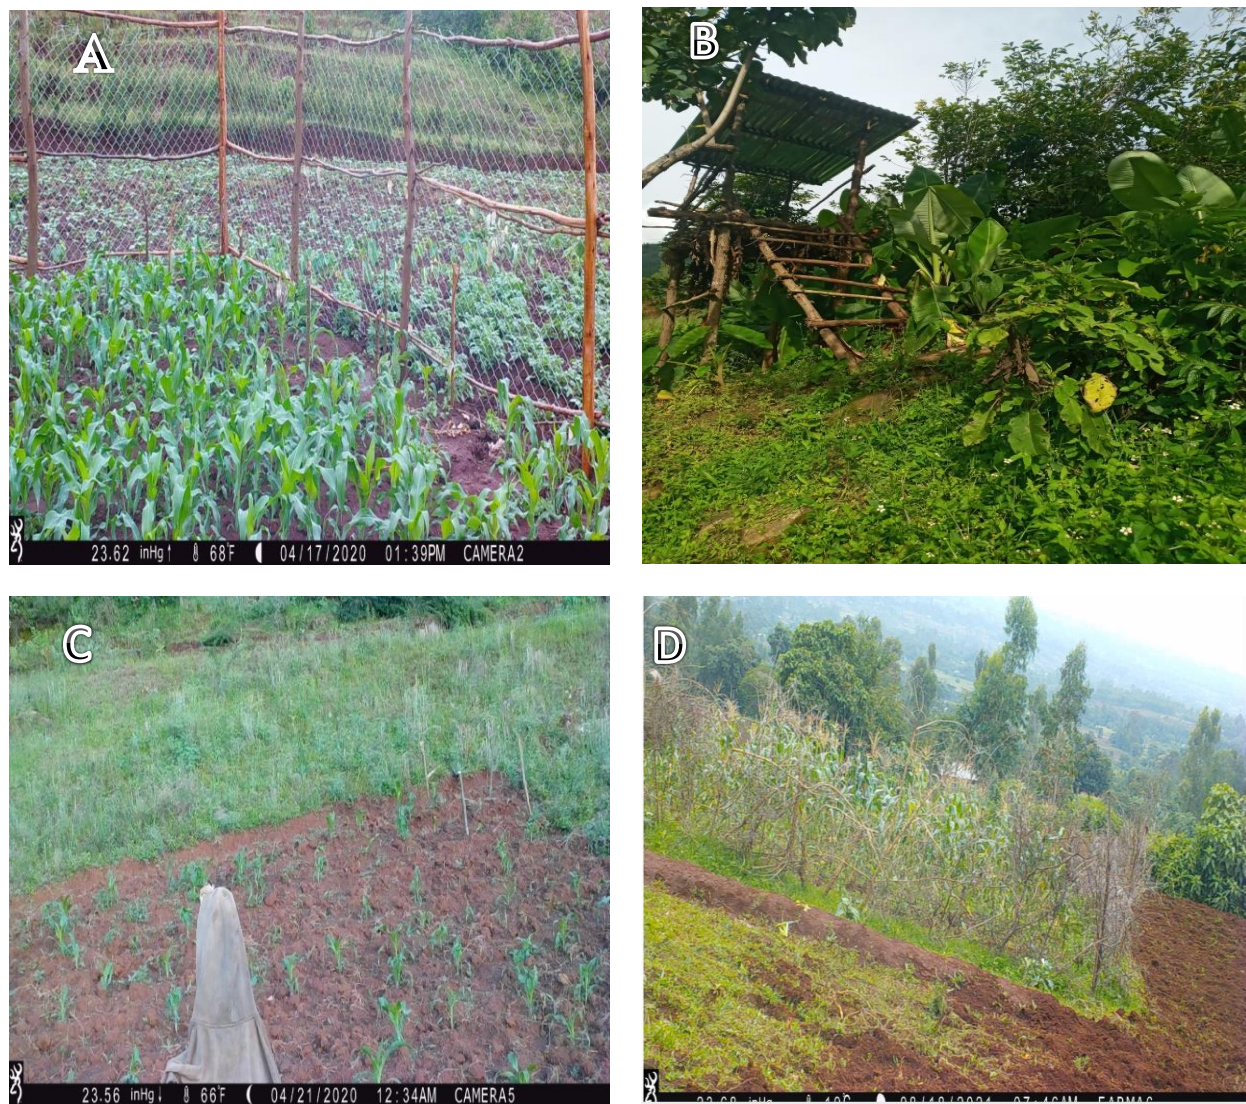

Fig 2. Various prevention strategies (Wire mesh (A), Human guardian tower (B), Scarecrow (C), Thorny bush (D)) were assessed in eight experimental maize field sites to evaluate their effectiveness in deterring crop raiders. The study was conducted in maize field sites located in Gurumu Woide and Kokate Marachare.

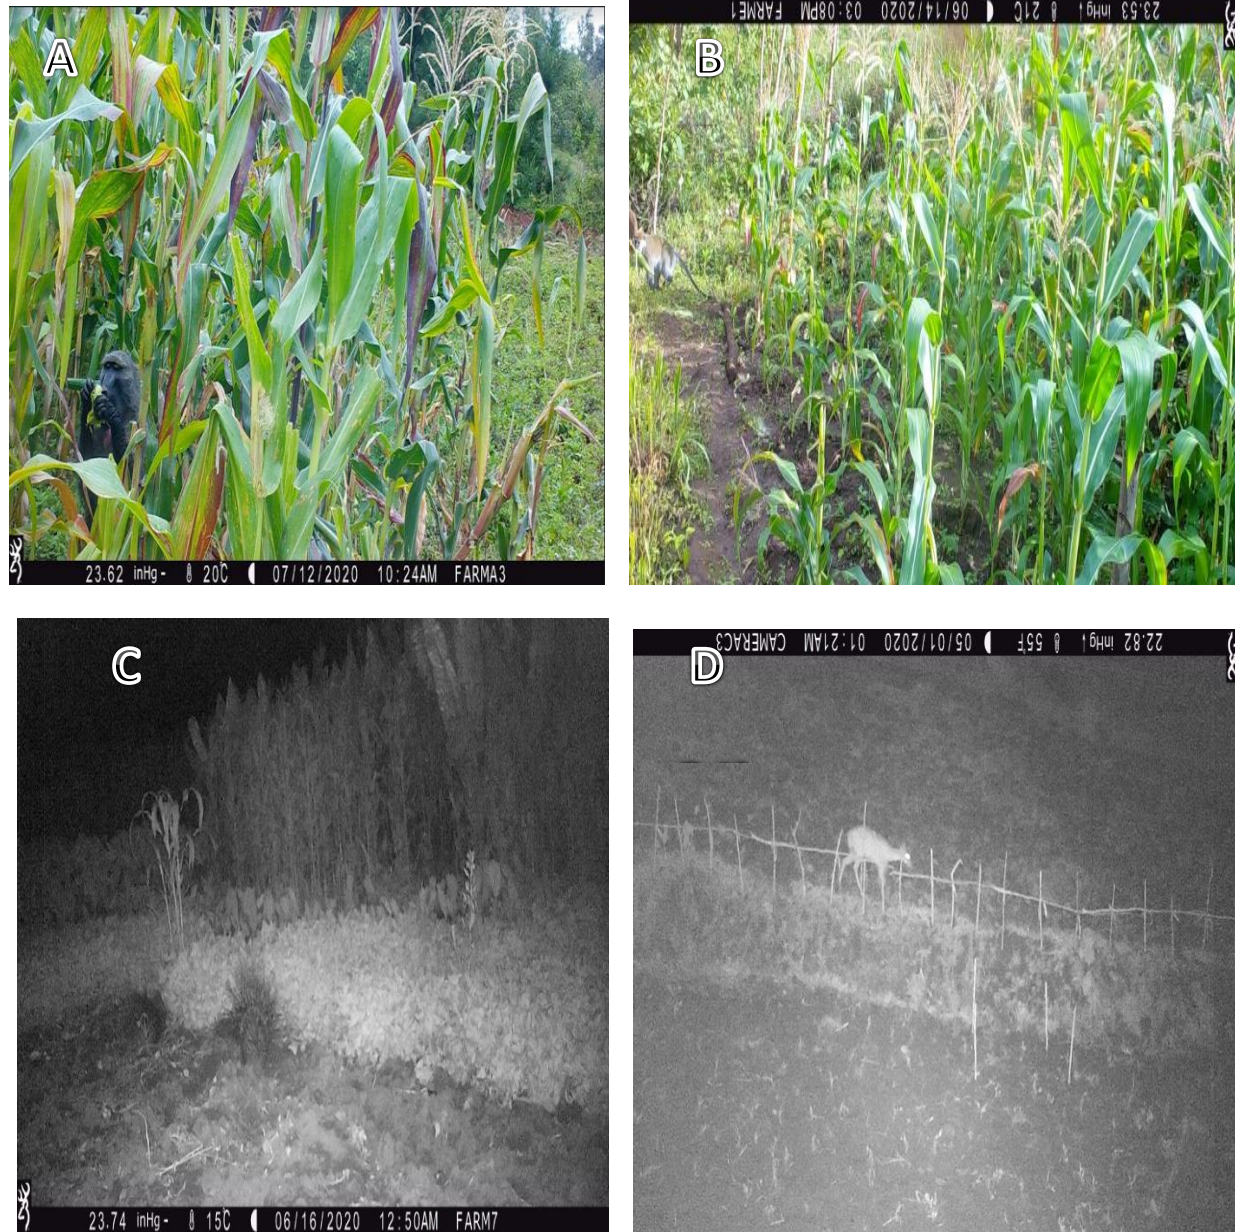

Fig 3. The images above depict camera trap captures of various wildlife species observed in maize field sites located in Damota Mountain, Southern Ethiopia: (A) Anubis baboons (*Papio anubis*) (B) Grivet monkeys (*Chlorocebus aethiops*), (C) Porcupine (*Hystrix cristata*), and (D) Bushbuck (*Tragelaphus scriptus*)





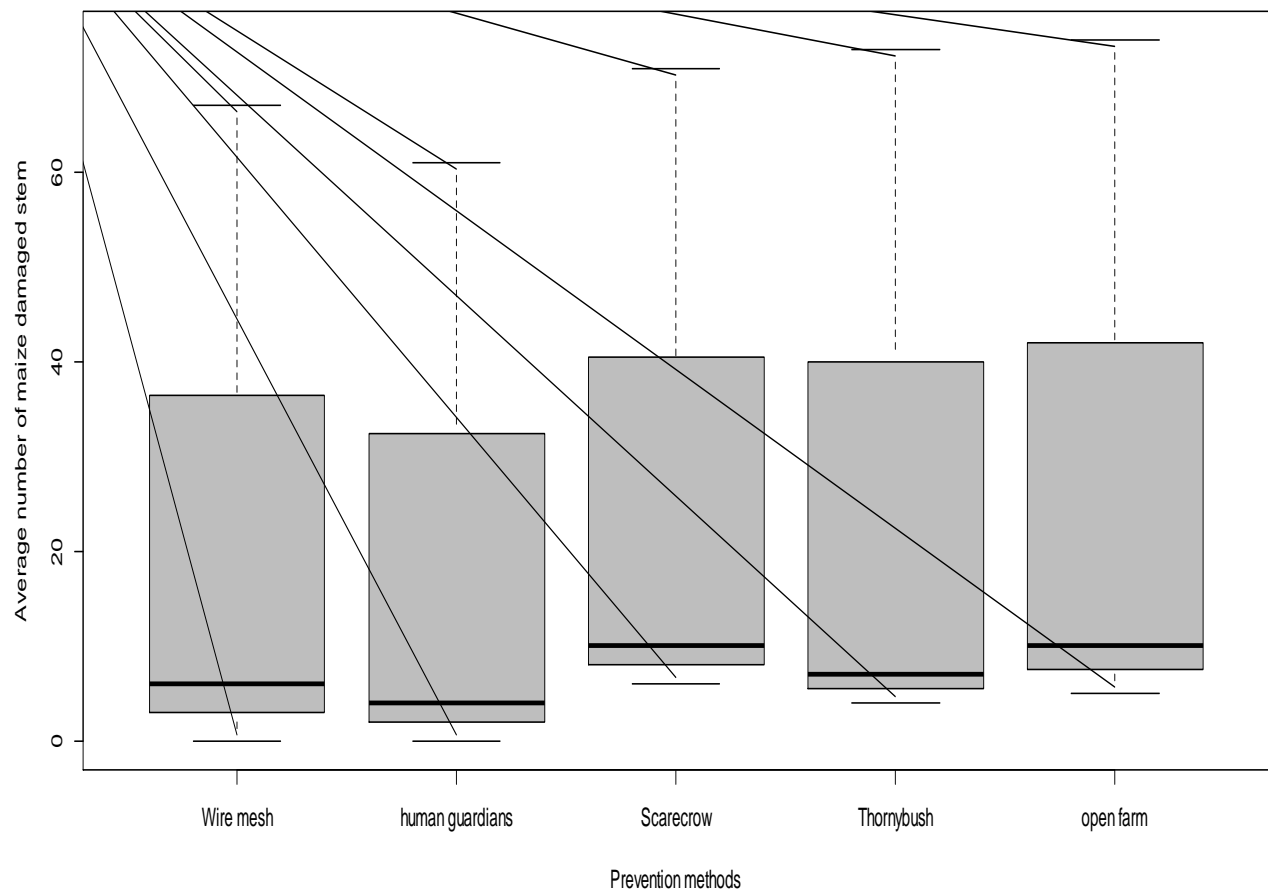

**Fig 4.** The average of maize stems ( $\approx$ number of cobs) damaged within 10m x 10m study plots by Olive baboons was examined in relation to various prevention methods at a distance of 50 meters from the forest edge during the 2020 and 2021 maize cropping seasons and crop phenology in the Gurumu Woide and Kokate Marachare (GW) sub-district. The boxplot illustrates a significant difference in crop damage among different prevention methods ( $p < .001$ ).

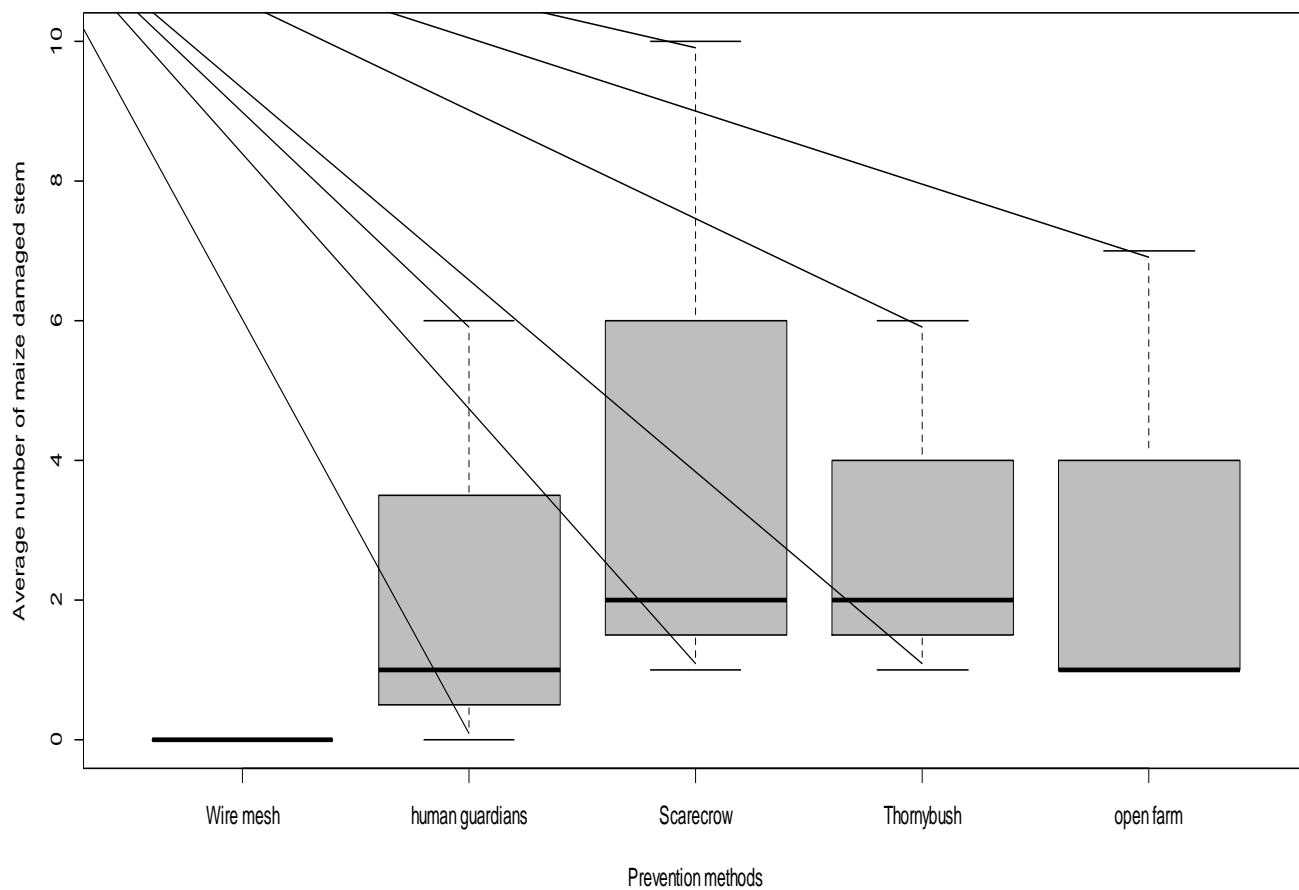

**Fig 5.** The average of maize stems ( $\approx$ the number of cobs) damaged within 10m x 10m study plots by grivet monkeys illustrates the relationship with various prevention methods at a distance of 50 meters from the forest edge during the 2020 and 2021 maize cropping seasons and crop phenology in the Kokate Marachare (KM) sub-district. The boxplot shows a significant difference in crop damage with different prevention methods ( $p < .005$ ).

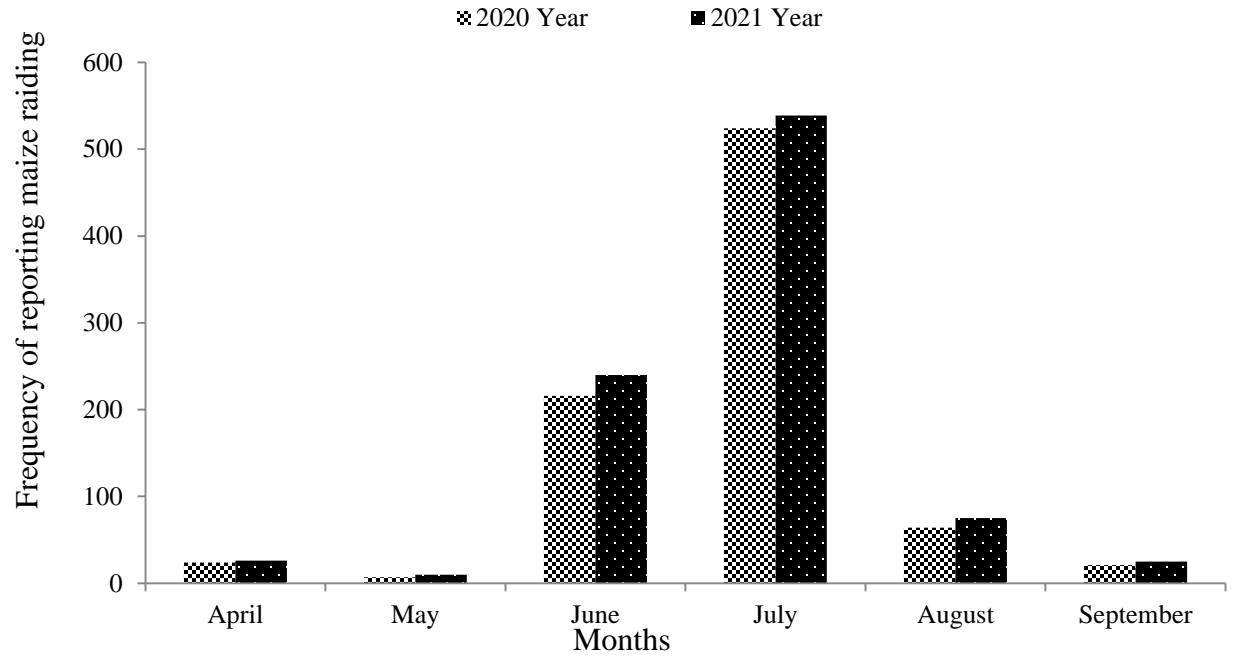

Fig 6. The frequency of primate maize crop raided during the 2020 and 2021 maize cropping seasons (n = 95)

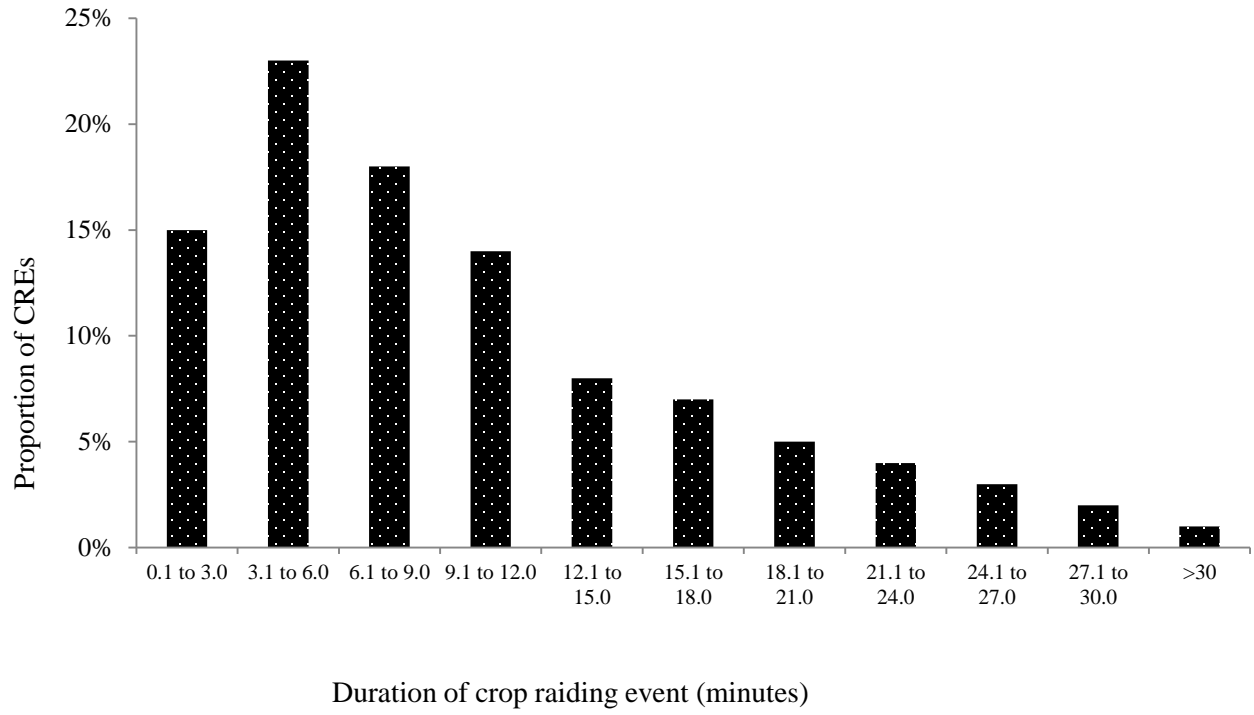

Fig 7. Relative frequency of raid durations by primate CREs (n = 95).

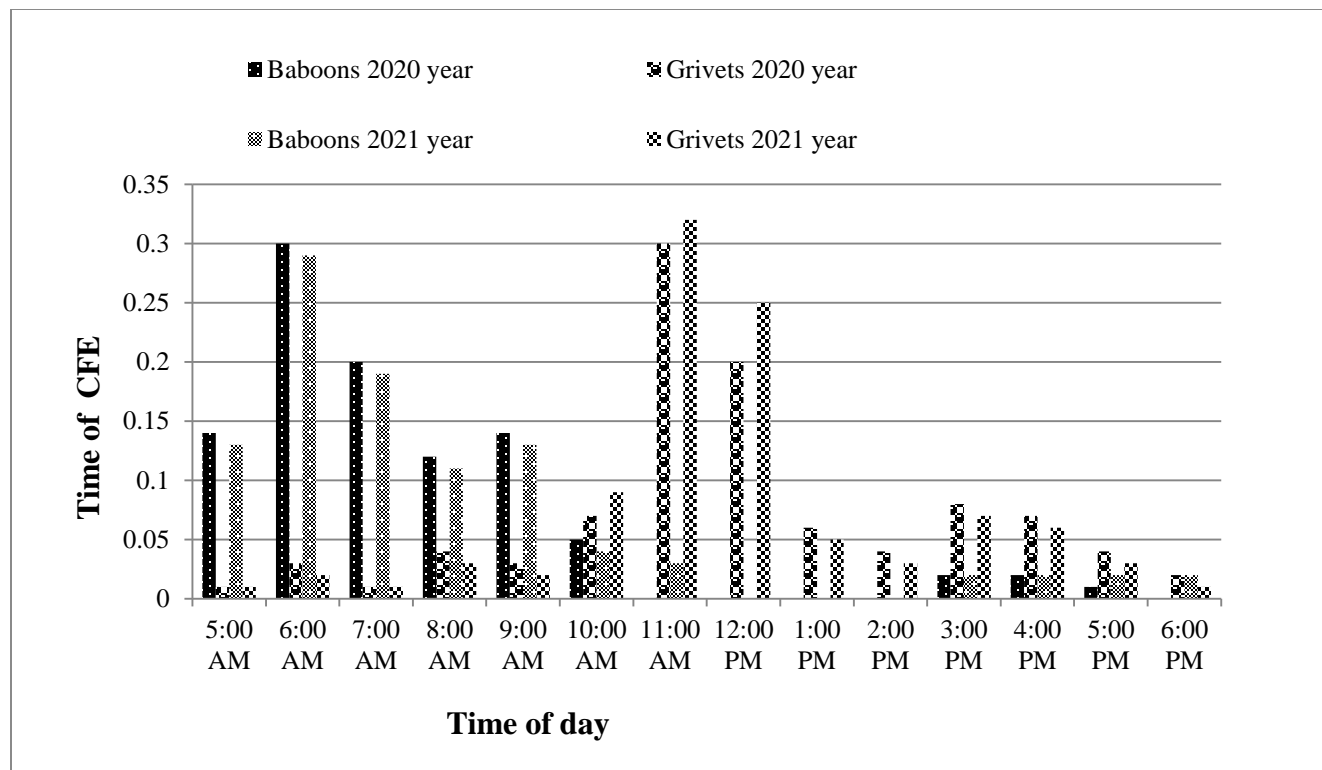

**Fig 8.** The frequency of baboon and grivet monkey CFEs by time of day ( $N = 95$ ) between April to September 2020 and 2021 years.

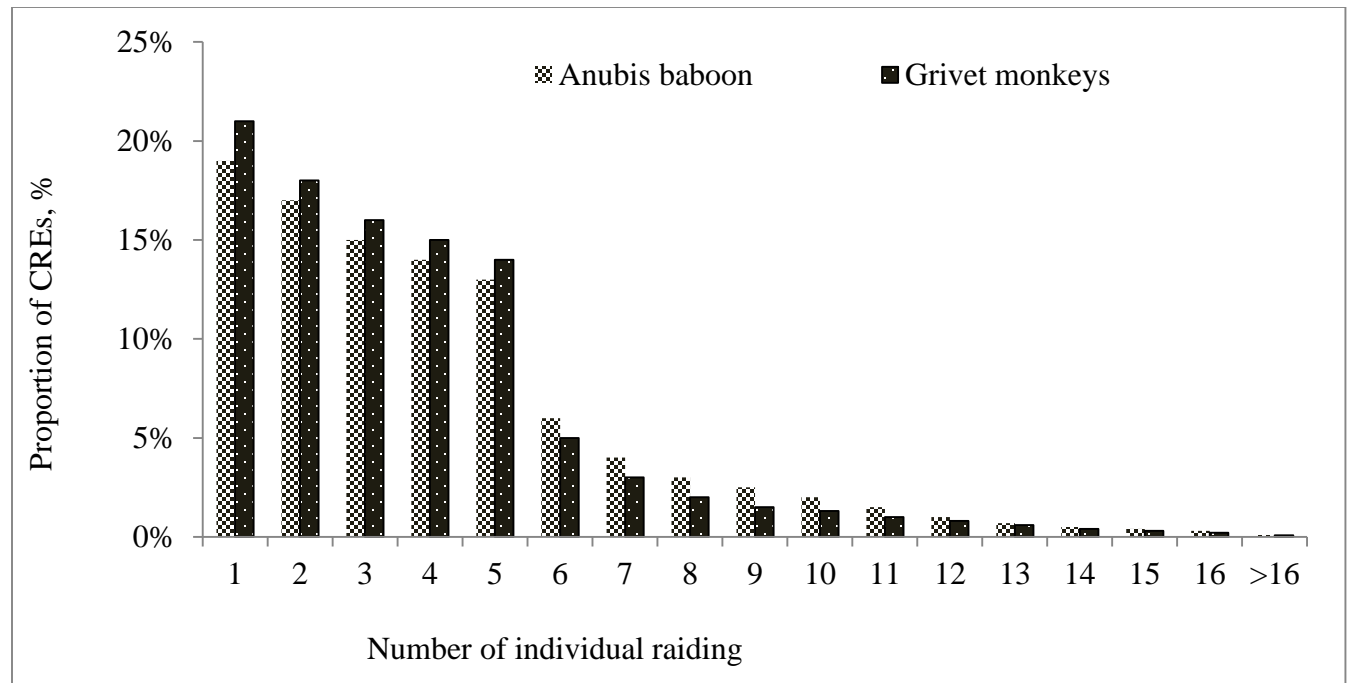

Fig 9. Relative frequency of raiding by primate CREs (n = 95)

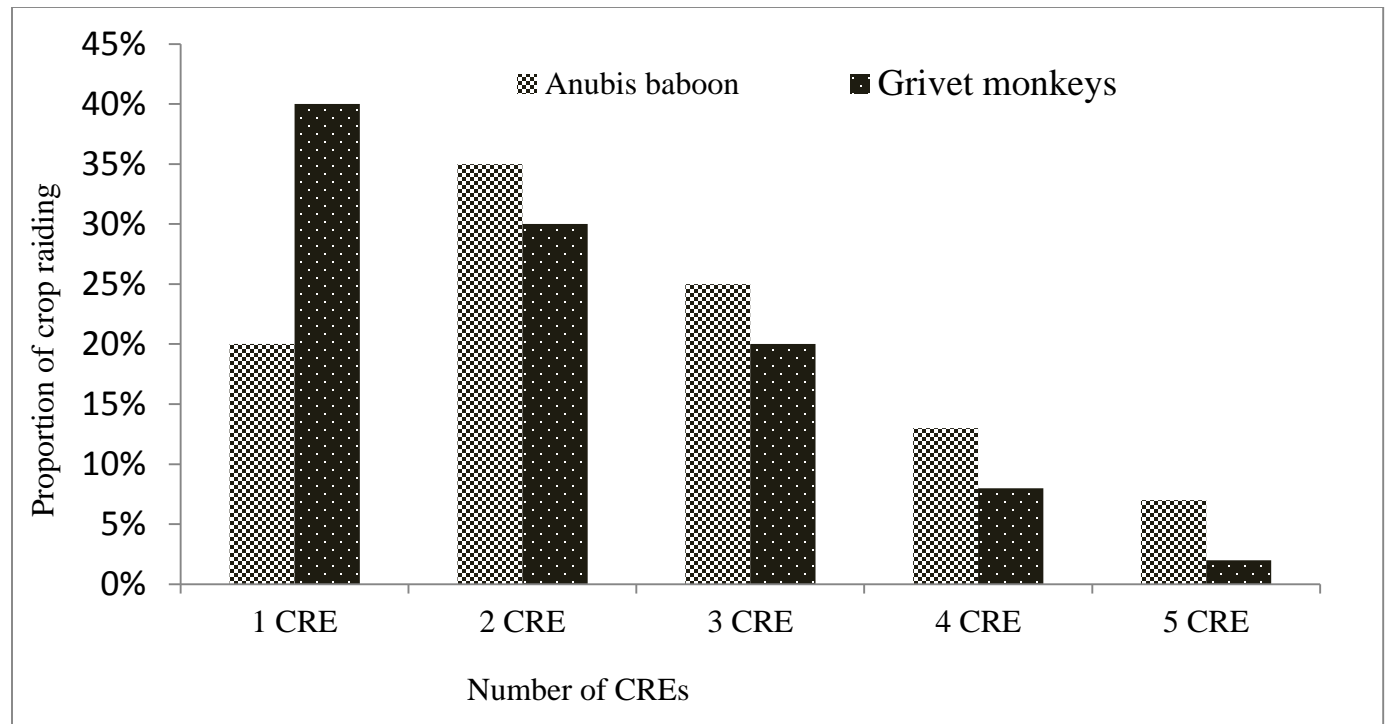

Fig 10. The frequency distribution of CREs that were single raids or within a series of multiple-CREs for each of these two primate species (n = 95)



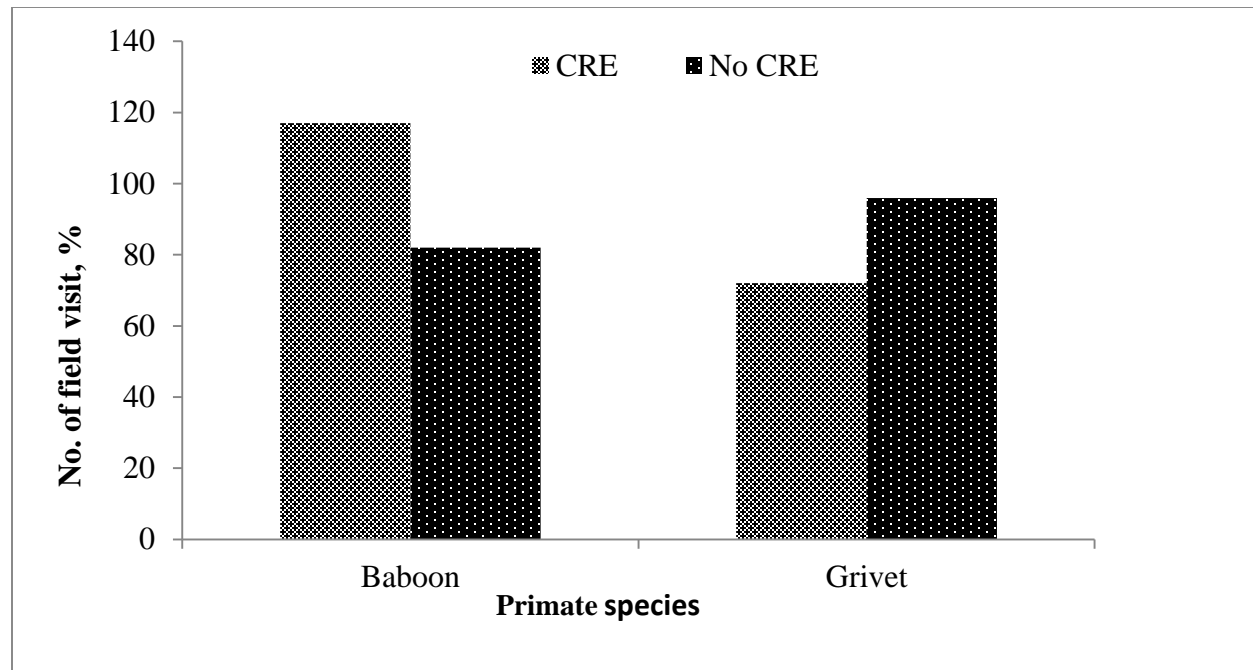

Fig 11. The number of baboon and grivet monkey field visits that did and did not involve crop-raiding events (CRE) on maize fields in the Highlands of Damota Mountain, April to September 2020 and 2021 years (n=367)

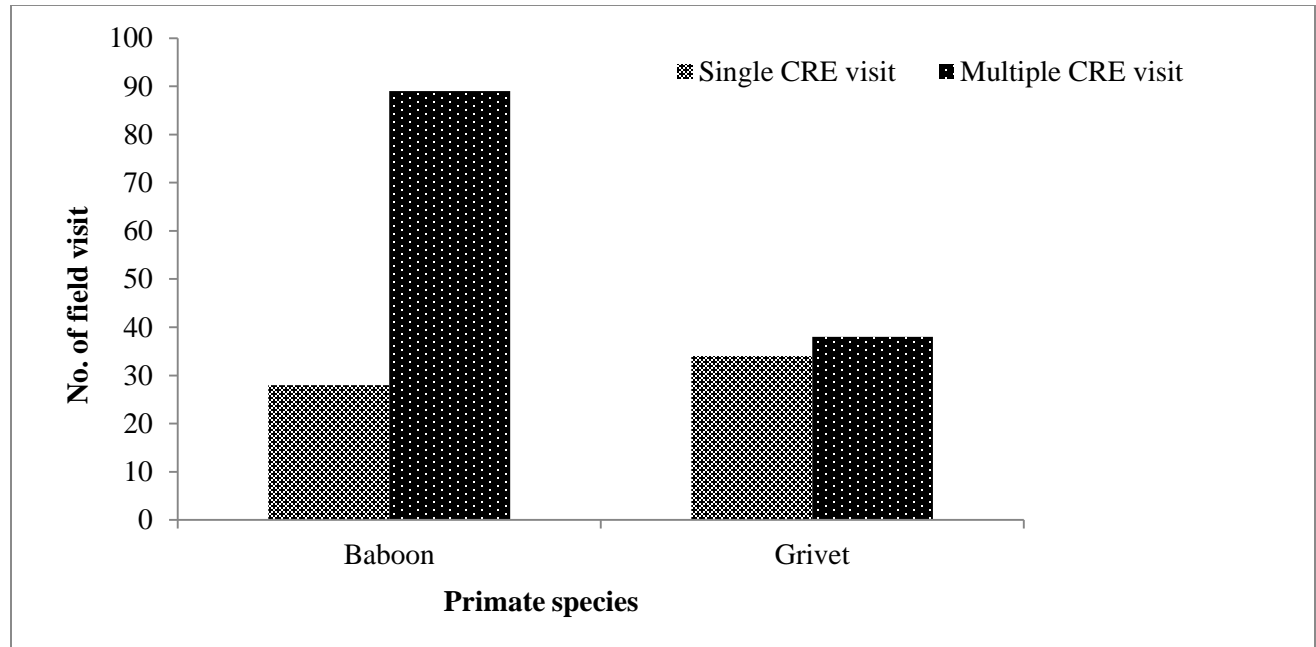

Fig 12. The number of baboon and grivet monkey field visits that involved single- and multi-crop raiding events on maize fields in the Highlands of Damota Mountain, April to September 2020 and 2021 years ( $n=189$ ).

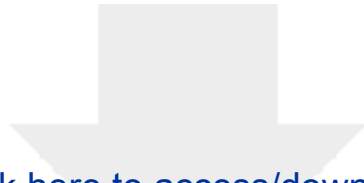

[Click here to access/download](#)

**Supporting Information**

S1. Fig 4. maize damaged by olive baboons.docx

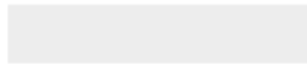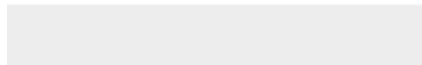



[Click here to access/download](#)

**Supporting Information**

S2. Fig 5. maize damage by grivet monkeys.docx

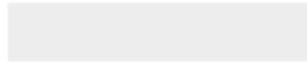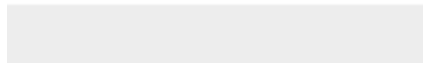



Click here to access/download

**Supporting Information**

S3 Table 4. Primate maize damage by camera traps..docx
